# Supplementary material
Source: PubMed Central journal article supplement (PMC4724326)
Supplement: NIHMS741245-supplement-Supp_Appendix_A-B.pdf [file NIHMS741245-supplement-Supp_Appendix_A-B.pdf]

# Web-based Supplementary Materials for “Gene-based Association Analysis for Censored Traits Via Fixed Effect Functional Regressions”

## Appendix A. More Simulation Results

In this supplementary section, more simulation results are provided. When some causal variants are rare and some are common, the empirical type I error results are presented in Tables A.1, A.3, and A.5, and the empirical power comparison are presented in Figures A.1, A.3, and A.5. When all causal variants are rare, the empirical type I error results are presented in Tables A.2, A.4, and A.6, and the empirical power comparison are presented in Figures A.2, A.4, and A.6.

Three sets of parameters are used in the simulations:

1. In Tables A.1 and A.2 and Figures A.1 and A.2, the order of B-spline basis was 4, and the number of B-spline basis functions was  $K = K_\beta = 6$ ; the number of Fourier basis functions was  $K = K_\beta = 7$ .
2. In Tables A.3 and A.4 and Figures A.3 and A.4, the order of B-spline basis was 4, and the number of B-spline basis functions was  $K = K_\beta = 8$ ; the number of Fourier basis functions was  $K = K_\beta = 9$ .
3. In Tables A.5 and A.6 and Figures A.5 and A.6, the order of B-spline basis was 4, and the number of B-spline basis functions was  $K = K_\beta = 12$ ; the number of Fourier basis functions was  $K = K_\beta = 13$ .

For the first two sets of parameters, 12 independent randomly seeded simulations were implemented to calculate the empirical type I error rates:  $10^5$  phenotype-genotype datasets in each simulation were generated to fit the proposed Cox models and to calculate the test statistics and related  $p$ -values for each combination of a sample size and a censoring scheme. The total number of simulations is  $1.2 \times 10^6$  in Tables A.1 and A.2. However, the computation of some simulations can not go through

due to the failure of model convergence. Thus, the total number of simulations ranges from  $10^6$  (or 600,000) to  $1.2 \times 10^6$  in Table A.3 (or Table A.4). After the simulations were complete, an empirical type I error rate was calculated as the proportion of the total  $p$ -values which were smaller than a given  $\alpha$  level.

For the third set of parameters, 24 independent randomly seeded simulations were implemented to calculate the empirical type I error rates:  $10^5$  phenotype-genotype datasets in each simulation were generated to fit the proposed Cox models and to calculate the test statistics and related  $p$ -values for each combination of a sample size and a censoring scheme. However, the computation of some simulations can not go through due to the failure of model convergence. Thus, the total number of simulations ranges from 0 to  $2.4 \times 10^6$ . After the simulations were complete, an empirical type I error rate was calculated as the proportion of the total  $p$ -values which were smaller than a given  $\alpha$  level. If the total number of simulations is 0, no type I error rate is available.

The empirical power levels in Figures A.1 and A.2 are slightly lower than those of Figures 1 and 2. On the other hand, the empirical power levels in Figures Figures A.3, A.4, A.5, and A.6 are similar to those of Figures 1 and 2. Therefore, the range of parameters  $8 \leq K = K_\beta \leq 13$  should be fine to use in fitting the proposed Cox models, in terms of controlling type I error rates well and good power.

Table A.1: **Empirical Type I Error Rates of the Cox FR LRT Statistics and Cox SKAT LRT, When All Variants in 6 kb Regions Were Used to Generate Genotype Data.** The order of B-spline basis was 4, and the number of B-spline basis functions was  $K = K_\beta = 6$ ; the number of Fourier basis functions was  $K = K_\beta = 7$ . The results of Cox SKAT LRT were from R SeqMeta package by Chen et al. (2014)

| Sample Size<br>$n$ | The Censoring Scheme | Number of Simulations | Nominal Level<br>$\alpha$ | Cox FR LRT Statistics            |                       |                           |                       | Cox SKAT LRT          |
|--------------------|----------------------|-----------------------|---------------------------|----------------------------------|-----------------------|---------------------------|-----------------------|-----------------------|
|                    |                      |                       |                           | Basis of both GVF and $\beta(u)$ |                       | Basis of beta-Smooth Only |                       |                       |
|                    |                      |                       |                           | B-sp Basis                       | Fourier Basis         | B-sp Basis                | Fourier Basis         |                       |
| 1,000              | $\infty$             | 1,200,000             | 0.05                      | 0.05296                          | 0.05309               | 0.05296                   | 0.05309               | 0.06914               |
|                    |                      |                       | $10^{-3}$                 | 0.00111                          | 0.00110               | 0.00111                   | 0.00110               | 0.00182               |
|                    |                      |                       | $10^{-4}$                 | 0.00012                          | 0.00012               | 0.00012                   | 0.00012               | 0.00021               |
|                    |                      |                       | $10^{-5}$                 | $1.166 \times 10^{-5}$           | $1.58 \times 10^{-5}$ | $1.17 \times 10^{-5}$     | $1.58 \times 10^{-5}$ | $2.75 \times 10^{-5}$ |
|                    | $U(0, 10)$           | 1,200,000             | 0.05                      | 0.05322                          | 0.05346               | 0.05322                   | 0.05346               | 0.07243               |
|                    |                      |                       | $10^{-3}$                 | 0.00114                          | 0.00117               | 0.00114                   | 0.00117               | 0.00185               |
|                    |                      |                       | $10^{-4}$                 | 0.00012                          | 0.00013               | 0.00012                   | 0.00013               | 0.00019               |
|                    |                      |                       | $10^{-5}$                 | $1.08 \times 10^{-5}$            | $1.25 \times 10^{-5}$ | $1.08 \times 10^{-5}$     | $1.25 \times 10^{-5}$ | $1.50 \times 10^{-5}$ |
|                    | $U(0, 5)$            | 1,200,000             | 0.05                      | 0.05360                          | 0.05363               | 0.05360                   | 0.05363               | 0.07733               |
|                    |                      |                       | $10^{-3}$                 | 0.00112                          | 0.00120               | 0.00112                   | 0.00120               | 0.00199               |
|                    |                      |                       | $10^{-4}$                 | 0.00012                          | 0.00011               | 0.00012                   | 0.00011               | 0.00021               |
|                    |                      |                       | $10^{-5}$                 | $1.50 \times 10^{-5}$            | $9.17 \times 10^{-6}$ | $1.50 \times 10^{-5}$     | $9.17 \times 10^{-6}$ | $1.83 \times 10^{-5}$ |
| $U(0, 3)$          | 1,200,000            | 0.05                  | 0.05447                   | 0.05441                          | 0.05447               | 0.05441                   | 0.08145               |                       |
|                    |                      | $10^{-3}$             | 0.00123                   | 0.00119                          | 0.00123               | 0.00119                   | 0.00196               |                       |
|                    |                      | $10^{-4}$             | 0.00014                   | 0.00012                          | 0.00014               | 0.00012                   | 0.00021               |                       |
|                    |                      | $10^{-5}$             | $1.33 \times 10^{-5}$     | $1.67 \times 10^{-5}$            | $1.33 \times 10^{-5}$ | $1.67 \times 10^{-5}$     | $1.83 \times 10^{-5}$ |                       |
| 2,000              | $\infty$             | 1,200,000             | 0.05                      | 0.05181                          | 0.05194               | 0.05181                   | 0.05194               | 0.06213               |
|                    |                      |                       | $10^{-3}$                 | 0.00111                          | 0.00109               | 0.00111                   | 0.00109               | 0.00142               |
|                    |                      |                       | $10^{-4}$                 | 0.00011                          | 0.00012               | 0.00011                   | 0.00012               | 0.00016               |
|                    |                      |                       | $10^{-5}$                 | $1.58 \times 10^{-5}$            | $1.42 \times 10^{-5}$ | $1.58 \times 10^{-5}$     | $1.42 \times 10^{-5}$ | $2.08 \times 10^{-5}$ |
|                    | $U(0, 10)$           | 1,200,000             | 0.05                      | 0.05155                          | 0.05173               | 0.05155                   | 0.05173               | 0.06411               |
|                    |                      |                       | $10^{-3}$                 | 0.00110                          | 0.00107               | 0.00110                   | 0.00107               | 0.00153               |
|                    |                      |                       | $10^{-4}$                 | 0.00014                          | 0.00013               | 0.00014                   | 0.00013               | 0.00015               |
|                    |                      |                       | $10^{-5}$                 | $1.58 \times 10^{-5}$            | $1.17 \times 10^{-5}$ | $1.58 \times 10^{-5}$     | $1.17 \times 10^{-5}$ | $2.33 \times 10^{-5}$ |
|                    | $U(0, 5)$            | 1,200,000             | 0.05                      | 0.05169                          | 0.05193               | 0.05169                   | 0.05193               | 0.06785               |
|                    |                      |                       | $10^{-3}$                 | 0.00109                          | 0.00106               | 0.00109                   | 0.00106               | 0.00156               |
|                    |                      |                       | $10^{-4}$                 | 0.00012                          | 0.00010               | 0.00012                   | 0.00010               | 0.00016               |
|                    |                      |                       | $10^{-5}$                 | $1.92 \times 10^{-5}$            | $1.42 \times 10^{-5}$ | $1.92 \times 10^{-5}$     | $1.42 \times 10^{-5}$ | $2.58 \times 10^{-5}$ |
| $U(0, 3)$          | 1,200,000            | 0.05                  | 0.05232                   | 0.05174                          | 0.05232               | 0.05174                   | 0.07222               |                       |
|                    |                      | $10^{-3}$             | 0.00113                   | 0.00115                          | 0.00113               | 0.00115                   | 0.00164               |                       |
|                    |                      | $10^{-4}$             | 0.00012                   | 0.00012                          | 0.00012               | 0.00012                   | 0.00017               |                       |
|                    |                      | $10^{-5}$             | $1.25 \times 10^{-5}$     | $1.17 \times 10^{-5}$            | $1.25 \times 10^{-5}$ | $1.17 \times 10^{-5}$     | $1.25 \times 10^{-5}$ |                       |
| 3,000              | $\infty$             | 1,200,000             | 0.05                      | 0.05118                          | 0.05148               | 0.05118                   | 0.05148               | 0.05969               |
|                    |                      |                       | $10^{-3}$                 | 0.00102                          | 0.00106               | 0.00102                   | 0.00106               | 0.00137               |
|                    |                      |                       | $10^{-4}$                 | 0.00011                          | 0.00010               | 0.00011                   | 0.00010               | 0.00012               |
|                    |                      |                       | $10^{-5}$                 | $9.17 \times 10^{-6}$            | $7.50 \times 10^{-6}$ | $9.17 \times 10^{-6}$     | $7.50 \times 10^{-6}$ | $1.67 \times 10^{-5}$ |
|                    | $U(0, 10)$           | 1,200,000             | 0.05                      | 0.05126                          | 0.05120               | 0.05126                   | 0.05120               | 0.06066               |
|                    |                      |                       | $10^{-3}$                 | 0.00109                          | 0.00103               | 0.00109                   | 0.00103               | 0.00139               |
|                    |                      |                       | $10^{-4}$                 | 0.00011                          | 0.00012               | 0.00011                   | 0.00012               | 0.00016               |
|                    |                      |                       | $10^{-5}$                 | $9.17 \times 10^{-6}$            | $1.08 \times 10^{-5}$ | $9.17 \times 10^{-6}$     | $1.08 \times 10^{-5}$ | $1.83 \times 10^{-5}$ |
|                    | $U(0, 5)$            | 1,200,000             | 0.05                      | 0.05120                          | 0.05131               | 0.05120                   | 0.05131               | 0.06287               |
|                    |                      |                       | $10^{-3}$                 | 0.00104                          | 0.00104               | 0.00104                   | 0.00104               | 0.00145               |
|                    |                      |                       | $10^{-4}$                 | 0.00010                          | 0.00009               | 0.00010                   | 0.00009               | 0.00018               |
|                    |                      |                       | $10^{-5}$                 | $1.17 \times 10^{-5}$            | $1.17 \times 10^{-5}$ | $1.17 \times 10^{-5}$     | $1.17 \times 10^{-5}$ | $1.83 \times 10^{-5}$ |
| $U(0, 3)$          | 1,200,000            | 0.05                  | 0.05135                   | 0.05136                          | 0.05135               | 0.05136                   | 0.06735               |                       |
|                    |                      | $10^{-3}$             | 0.00104                   | 0.00106                          | 0.00104               | 0.00106                   | 0.00156               |                       |
|                    |                      | $10^{-4}$             | 0.00012                   | 0.00011                          | 0.00012               | 0.00011                   | 0.00016               |                       |
|                    |                      | $10^{-5}$             | $1.25 \times 10^{-5}$     | $1.00 \times 10^{-5}$            | $1.25 \times 10^{-5}$ | $1.00 \times 10^{-5}$     | $1.33 \times 10^{-5}$ |                       |
| 4,000              | $\infty$             | 1,200,000             | 0.05                      | 0.05041                          | 0.05061               | 0.05041                   | 0.05061               | 0.05753               |
|                    |                      |                       | $10^{-3}$                 | 0.00102                          | 0.00106               | 0.00102                   | 0.00106               | 0.00127               |
|                    |                      |                       | $10^{-4}$                 | 0.00009                          | 0.00010               | 0.00009                   | 0.00010               | 0.00014               |
|                    |                      |                       | $10^{-5}$                 | $9.17 \times 10^{-6}$            | $1.00 \times 10^{-5}$ | $9.17 \times 10^{-6}$     | $1.00 \times 10^{-5}$ | $1.41 \times 10^{-5}$ |
|                    | $U(0, 10)$           | 1,200,000             | 0.05                      | 0.05076                          | 0.05081               | 0.05076                   | 0.05081               | 0.05863               |
|                    |                      |                       | $10^{-3}$                 | 0.00105                          | 0.00106               | 0.00105                   | 0.00106               | 0.00131               |
|                    |                      |                       | $10^{-4}$                 | 0.00011                          | 0.00012               | 0.00011                   | 0.00012               | 0.00014               |
|                    |                      |                       | $10^{-5}$                 | $1.25 \times 10^{-5}$            | $5.83 \times 10^{-6}$ | $1.25 \times 10^{-5}$     | $5.83 \times 10^{-6}$ | $1.58 \times 10^{-5}$ |
|                    | $U(0, 5)$            | 1,200,000             | 0.05                      | 0.05095                          | 0.05088               | 0.05095                   | 0.05088               | 0.06078               |
|                    |                      |                       | $10^{-3}$                 | 0.00101                          | 0.00104               | 0.00101                   | 0.00104               | 0.00133               |
|                    |                      |                       | $10^{-4}$                 | 0.00011                          | 0.00011               | 0.00011                   | 0.00011               | 0.00012               |
|                    |                      |                       | $10^{-5}$                 | $8.33 \times 10^{-6}$            | $7.50 \times 10^{-6}$ | $8.33 \times 10^{-6}$     | $7.50 \times 10^{-6}$ | $1.58 \times 10^{-5}$ |
| $U(0, 3)$          | 1,200,000            | 0.05                  | 0.05133                   | 0.05106                          | 0.05133               | 0.05106                   | 0.06455               |                       |
|                    |                      | $10^{-3}$             | 0.00105                   | 0.00105                          | 0.00105               | 0.00105                   | 0.00136               |                       |
|                    |                      | $10^{-4}$             | 0.00011                   | 0.00011                          | 0.00011               | 0.00011                   | 0.00014               |                       |
|                    |                      | $10^{-5}$             | $5.00 \times 10^{-6}$     | $6.67 \times 10^{-6}$            | $5.00 \times 10^{-6}$ | $6.67 \times 10^{-6}$     | $1.75 \times 10^{-5}$ |                       |

Table A.2: **Empirical Type I Error Rates of the Cox FR LRT Statistics and Cox SKAT LRT, When Only Rare Variants in 6 kb Regions Were Used to Generate Genotype Data.** The order of B-spline basis was 4, and the number of B-spline basis functions was  $K = K_\beta = 6$ ; the number of Fourier basis functions was  $K = K_\beta = 7$ . The results of Cox SKAT LRT were from R SeqMeta package by Chen et al. (2014).

| Sample Size<br>$n$ | The Censoring Scheme | Number of Simulations | Nominal Level<br>$\alpha$ | Cox FR LRT Statistics            |                       |                           |                       | Cox SKAT LRT          |
|--------------------|----------------------|-----------------------|---------------------------|----------------------------------|-----------------------|---------------------------|-----------------------|-----------------------|
|                    |                      |                       |                           | Basis of both GVF and $\beta(u)$ |                       | Basis of beta-Smooth Only |                       |                       |
|                    |                      |                       |                           | B-sp Basis                       | Fourier Basis         | B-sp Basis                | Fourier Basis         |                       |
| 1,000              | $\infty$             | 1,200,000             | 0.05                      | 0.05393                          | 0.05425               | 0.05393                   | 0.05425               | 0.07166               |
|                    |                      |                       | $10^{-3}$                 | 0.00120                          | 0.00117               | 0.00120                   | 0.00117               | 0.00196               |
|                    |                      |                       | $10^{-4}$                 | 0.00013                          | 0.00012               | 0.00013                   | 0.00012               | 0.00022               |
|                    |                      |                       | $10^{-5}$                 | $1.17 \times 10^{-5}$            | $6.67 \times 10^{-6}$ | $1.17 \times 10^{-5}$     | $6.67 \times 10^{-6}$ | $2.75 \times 10^{-5}$ |
|                    | $U(0, 10)$           | 1,200,000             | 0.05                      | 0.05461                          | 0.05480               | 0.05461                   | 0.05480               | 0.07489               |
|                    |                      |                       | $10^{-3}$                 | 0.00115                          | 0.00118               | 0.00115                   | 0.00118               | 0.00200               |
|                    |                      |                       | $10^{-4}$                 | 0.00013                          | 0.00014               | 0.00013                   | 0.00014               | 0.00022               |
|                    |                      |                       | $10^{-5}$                 | $1.50 \times 10^{-5}$            | $1.92 \times 10^{-5}$ | $1.50 \times 10^{-5}$     | $1.92 \times 10^{-5}$ | $1.58 \times 10^{-5}$ |
|                    | $U(0, 5)$            | 1,200,000             | 0.05                      | 0.05610                          | 0.05561               | 0.05610                   | 0.05561               | 0.08054               |
|                    |                      |                       | $10^{-3}$                 | 0.00125                          | 0.00123               | 0.00125                   | 0.00123               | 0.00216               |
|                    |                      |                       | $10^{-4}$                 | 0.00013                          | 0.00014               | 0.00013                   | 0.00014               | 0.00022               |
|                    |                      |                       | $10^{-5}$                 | $1.33 \times 10^{-5}$            | $1.75 \times 10^{-5}$ | $1.33 \times 10^{-5}$     | $1.75 \times 10^{-5}$ | $2.33 \times 10^{-5}$ |
| $U(0, 3)$          | 1,200,000            | 0.05                  | 0.05917                   | 0.05808                          | 0.05918               | 0.05808                   | 0.08462               |                       |
|                    |                      | $10^{-3}$             | 0.00134                   | 0.00134                          | 0.00134               | 0.00134                   | 0.00209               |                       |
|                    |                      | $10^{-4}$             | 0.00012                   | 0.00015                          | 0.00012               | 0.00015                   | 0.00023               |                       |
|                    |                      | $10^{-5}$             | $1.50 \times 10^{-5}$     | $1.42 \times 10^{-5}$            | $1.50 \times 10^{-5}$ | $1.42 \times 10^{-5}$     | $2.00 \times 10^{-5}$ |                       |
| 2,000              | $\infty$             | 1,200,000             | 0.05                      | 0.05196                          | 0.05208               | 0.05196                   | 0.05208               | 0.06348               |
|                    |                      |                       | $10^{-3}$                 | 0.00104                          | 0.00102               | 0.00104                   | 0.00102               | 0.00150               |
|                    |                      |                       | $10^{-4}$                 | 0.00012                          | 0.00012               | 0.00012                   | 0.00012               | 0.00016               |
|                    |                      |                       | $10^{-5}$                 | $1.58 \times 10^{-5}$            | $9.17 \times 10^{-6}$ | $1.58 \times 10^{-5}$     | $9.17 \times 10^{-6}$ | $2.08 \times 10^{-5}$ |
|                    | $U(0, 10)$           | 1,200,000             | 0.05                      | 0.05254                          | 0.05238               | 0.05254                   | 0.05238               | 0.06542               |
|                    |                      |                       | $10^{-3}$                 | 0.00109                          | 0.00111               | 0.00109                   | 0.00111               | 0.00161               |
|                    |                      |                       | $10^{-4}$                 | 0.00012                          | 0.00013               | 0.00012                   | 0.00013               | 0.00017               |
|                    |                      |                       | $10^{-5}$                 | $1.75 \times 10^{-5}$            | $1.42 \times 10^{-5}$ | $1.75 \times 10^{-5}$     | $1.42 \times 10^{-5}$ | $2.33 \times 10^{-5}$ |
|                    | $U(0, 5)$            | 1,200,000             | 0.05                      | 0.05310                          | 0.05315               | 0.05310                   | 0.05315               | 0.06932               |
|                    |                      |                       | $10^{-3}$                 | 0.00115                          | 0.00109               | 0.00115                   | 0.00109               | 0.00163               |
|                    |                      |                       | $10^{-4}$                 | 0.00011                          | 0.00012               | 0.00011                   | 0.00012               | 0.00017               |
|                    |                      |                       | $10^{-5}$                 | $1.00 \times 10^{-5}$            | $1.25 \times 10^{-5}$ | $1.00 \times 10^{-5}$     | $1.25 \times 10^{-5}$ | $2.75 \times 10^{-5}$ |
| $U(0, 3)$          | 1,200,000            | 0.05                  | 0.05469                   | 0.05404                          | 0.05469               | 0.05404                   | 0.07463               |                       |
|                    |                      | $10^{-3}$             | 0.00122                   | 0.00117                          | 0.00122               | 0.00117                   | 0.00173               |                       |
|                    |                      | $10^{-4}$             | 0.00013                   | 0.00013                          | 0.00013               | 0.00013                   | 0.00018               |                       |
|                    |                      | $10^{-5}$             | $1.17 \times 10^{-5}$     | $9.17 \times 10^{-6}$            | $1.17 \times 10^{-5}$ | $9.17 \times 10^{-6}$     | $1.08 \times 10^{-5}$ |                       |
| 3,000              | $\infty$             | 1,200,000             | 0.05                      | 0.05182                          | 0.05191               | 0.05182                   | 0.05191               | 0.06058               |
|                    |                      |                       | $10^{-3}$                 | 0.00106                          | 0.00108               | 0.00106                   | 0.00108               | 0.00140               |
|                    |                      |                       | $10^{-4}$                 | 0.00011                          | 0.00010               | 0.00011                   | 0.00010               | 0.00015               |
|                    |                      |                       | $10^{-5}$                 | $6.67 \times 10^{-6}$            | $8.33 \times 10^{-6}$ | $6.67 \times 10^{-6}$     | $8.33 \times 10^{-6}$ | $1.50 \times 10^{-5}$ |
|                    | $U(0, 10)$           | 1,200,000             | 0.05                      | 0.05151                          | 0.05144               | 0.05151                   | 0.05144               | 0.06161               |
|                    |                      |                       | $10^{-3}$                 | 0.00104                          | 0.00104               | 0.00104                   | 0.00104               | 0.00146               |
|                    |                      |                       | $10^{-4}$                 | 0.00010                          | 0.00011               | 0.00010                   | 0.00011               | 0.00015               |
|                    |                      |                       | $10^{-5}$                 | $1.50 \times 10^{-5}$            | $1.33 \times 10^{-5}$ | $1.50 \times 10^{-5}$     | $1.33 \times 10^{-5}$ | $2.00 \times 10^{-5}$ |
|                    | $U(0, 5)$            | 1,200,000             | 0.05                      | 0.05230                          | 0.05190               | 0.05230                   | 0.05190               | 0.06425               |
|                    |                      |                       | $10^{-3}$                 | 0.00112                          | 0.00110               | 0.00112                   | 0.00110               | 0.00150               |
|                    |                      |                       | $10^{-4}$                 | 0.00010                          | 0.00012               | 0.00010                   | 0.00012               | 0.00019               |
|                    |                      |                       | $10^{-5}$                 | $1.25 \times 10^{-5}$            | $1.33 \times 10^{-5}$ | $1.25 \times 10^{-5}$     | $1.33 \times 10^{-5}$ | $1.92 \times 10^{-5}$ |
| $U(0, 3)$          | 1,200,000            | 0.05                  | 0.05353                   | 0.05279                          | 0.05353               | 0.05279                   | 0.06887               |                       |
|                    |                      | $10^{-3}$             | 0.00111                   | 0.00108                          | 0.00111               | 0.00108                   | 0.00159               |                       |
|                    |                      | $10^{-4}$             | 0.00011                   | 0.00010                          | 0.00011               | 0.00010                   | 0.00015               |                       |
|                    |                      | $10^{-5}$             | $1.58 \times 10^{-5}$     | $1.25 \times 10^{-5}$            | $1.58 \times 10^{-5}$ | $1.25 \times 10^{-5}$     | $1.33 \times 10^{-5}$ |                       |
| 4,000              | $\infty$             | 1,200,000             | 0.05                      | 0.05109                          | 0.05130               | 0.05109                   | 0.05130               | 0.05825               |
|                    |                      |                       | $10^{-3}$                 | 0.00104                          | 0.00108               | 0.00104                   | 0.00108               | 0.00130               |
|                    |                      |                       | $10^{-4}$                 | 0.00011                          | 0.00012               | 0.00011                   | 0.00012               | 0.00014               |
|                    |                      |                       | $10^{-5}$                 | $1.58 \times 10^{-5}$            | $1.50 \times 10^{-5}$ | $1.58 \times 10^{-5}$     | $1.50 \times 10^{-5}$ | $1.83 \times 10^{-5}$ |
|                    | $U(0, 10)$           | 1,200,000             | 0.05                      | 0.05117                          | 0.05089               | 0.05117                   | 0.05089               | 0.05932               |
|                    |                      |                       | $10^{-3}$                 | 0.00102                          | 0.00108               | 0.00102                   | 0.00108               | 0.00130               |
|                    |                      |                       | $10^{-4}$                 | 0.00010                          | 0.00011               | 0.00010                   | 0.00011               | 0.00015               |
|                    |                      |                       | $10^{-5}$                 | $1.42 \times 10^{-5}$            | $1.42 \times 10^{-5}$ | $1.42 \times 10^{-5}$     | $1.42 \times 10^{-5}$ | $1.42 \times 10^{-5}$ |
|                    | $U(0, 5)$            | 1,200,000             | 0.05                      | 0.05171                          | 0.05150               | 0.05171                   | 0.05150               | 0.06173               |
|                    |                      |                       | $10^{-3}$                 | 0.00103                          | 0.00106               | 0.00103                   | 0.00106               | 0.00138               |
|                    |                      |                       | $10^{-4}$                 | 0.00010                          | 0.00012               | 0.00010                   | 0.00012               | 0.00012               |
|                    |                      |                       | $10^{-5}$                 | $1.08 \times 10^{-5}$            | $8.33 \times 10^{-6}$ | $1.08 \times 10^{-5}$     | $8.33 \times 10^{-6}$ | $1.17 \times 10^{-5}$ |
| $U(0, 3)$          | 1,200,000            | 0.05                  | 0.05215                   | 0.05207                          | 0.05215               | 0.05207                   | 0.06585               |                       |
|                    |                      | $10^{-3}$             | 0.00111                   | 0.00108                          | 0.00111               | 0.00108                   | 0.00140               |                       |
|                    |                      | $10^{-4}$             | 0.00010                   | 0.00010                          | 0.00010               | 0.00010                   | 0.00014               |                       |
|                    |                      | $10^{-5}$             | $1.33 \times 10^{-5}$     | $1.50 \times 10^{-5}$            | $1.33 \times 10^{-5}$ | $1.50 \times 10^{-5}$     | $1.58 \times 10^{-5}$ |                       |

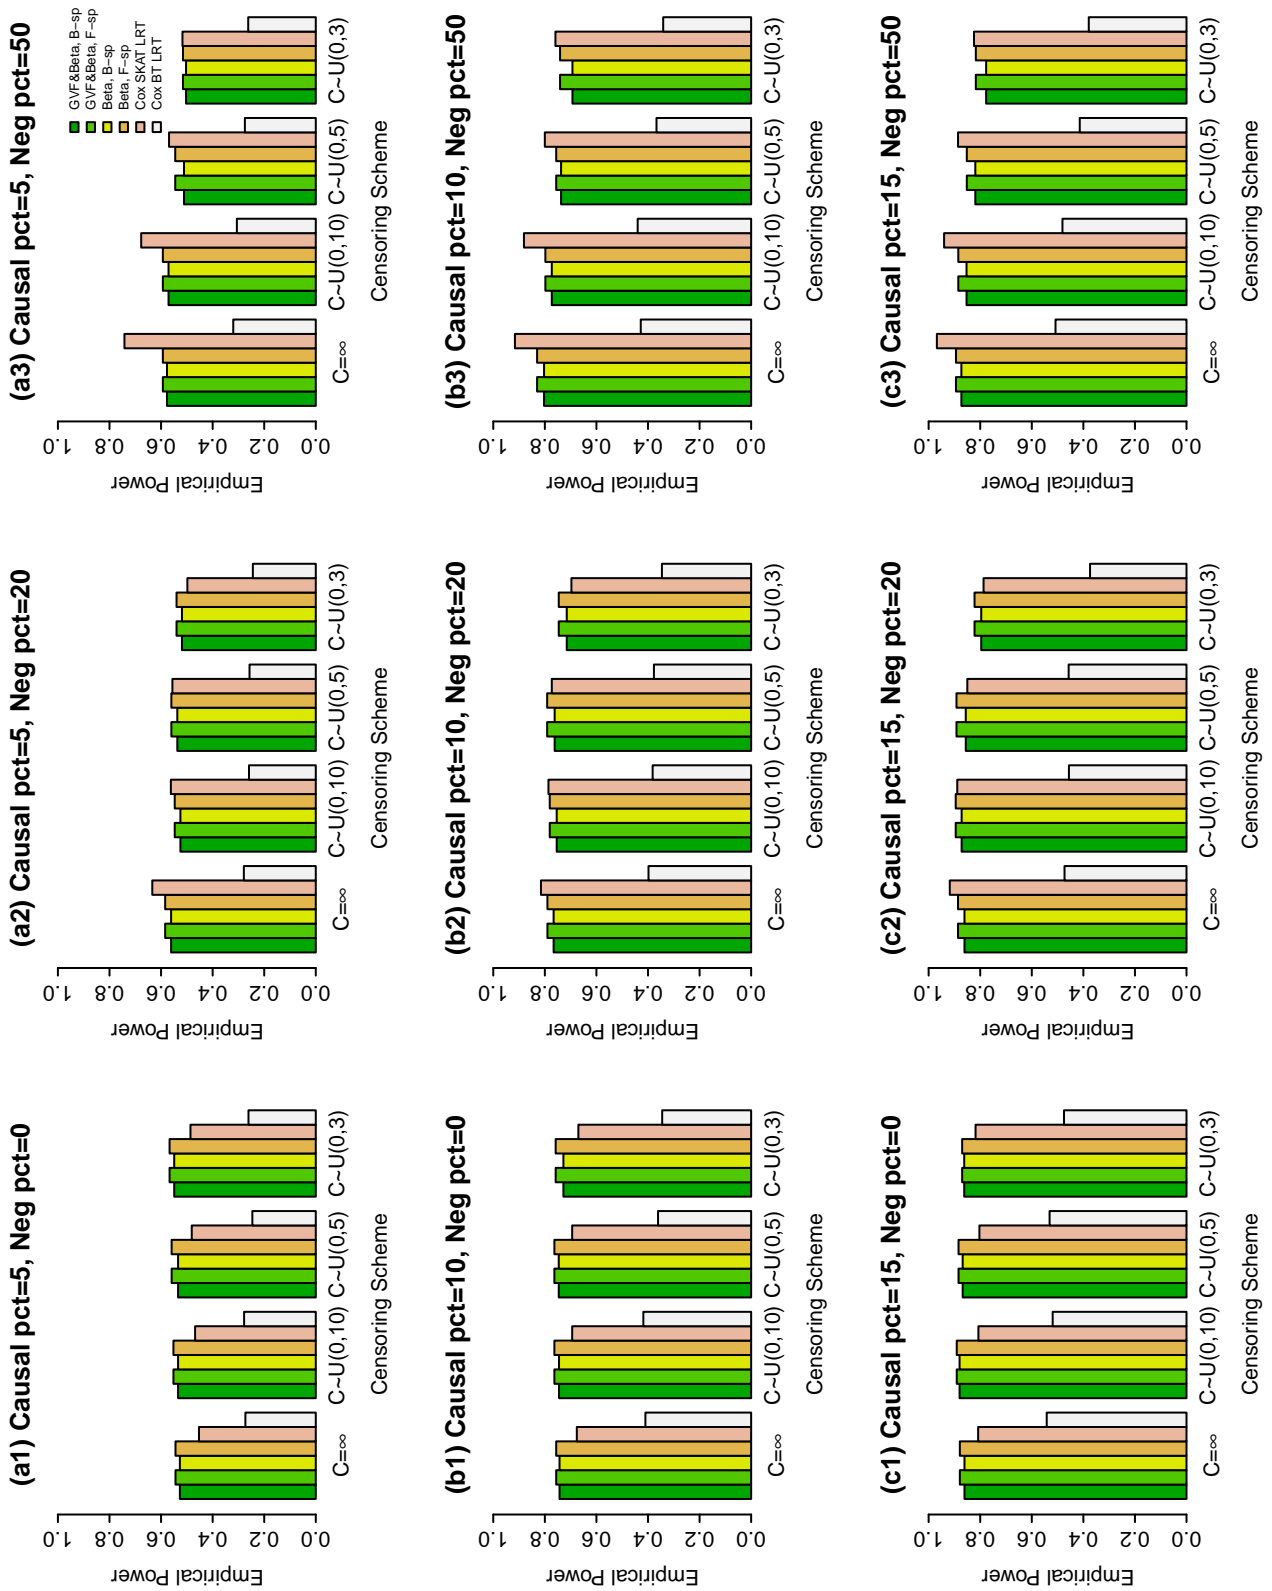

Figure A.1: The Empirical Power of the Cox FR LRT Statistics of the Cox Models (4) and (5) and Cox SKAT LRT and Cox BT LRT by Chen et al. (2014) at  $\alpha = 0.001$ , When Some Causal Variants are Rare and Some are Common and a Sample Size of 2,000. When Neg pct = 0, All Causal Variants Had Positive Effects; When Neg pct = 20, 20%/80% Causal Variants Had Negative/Positive Effects; When Neg pct = 50, 50%/50% Causal Variants Had Negative/Positive Effects. The order of B-spline basis was 4, and the number of B-spline basis functions was  $K = K_\beta = 6$ ; the number of Fourier basis functions was  $K = K_\beta = 7$ .

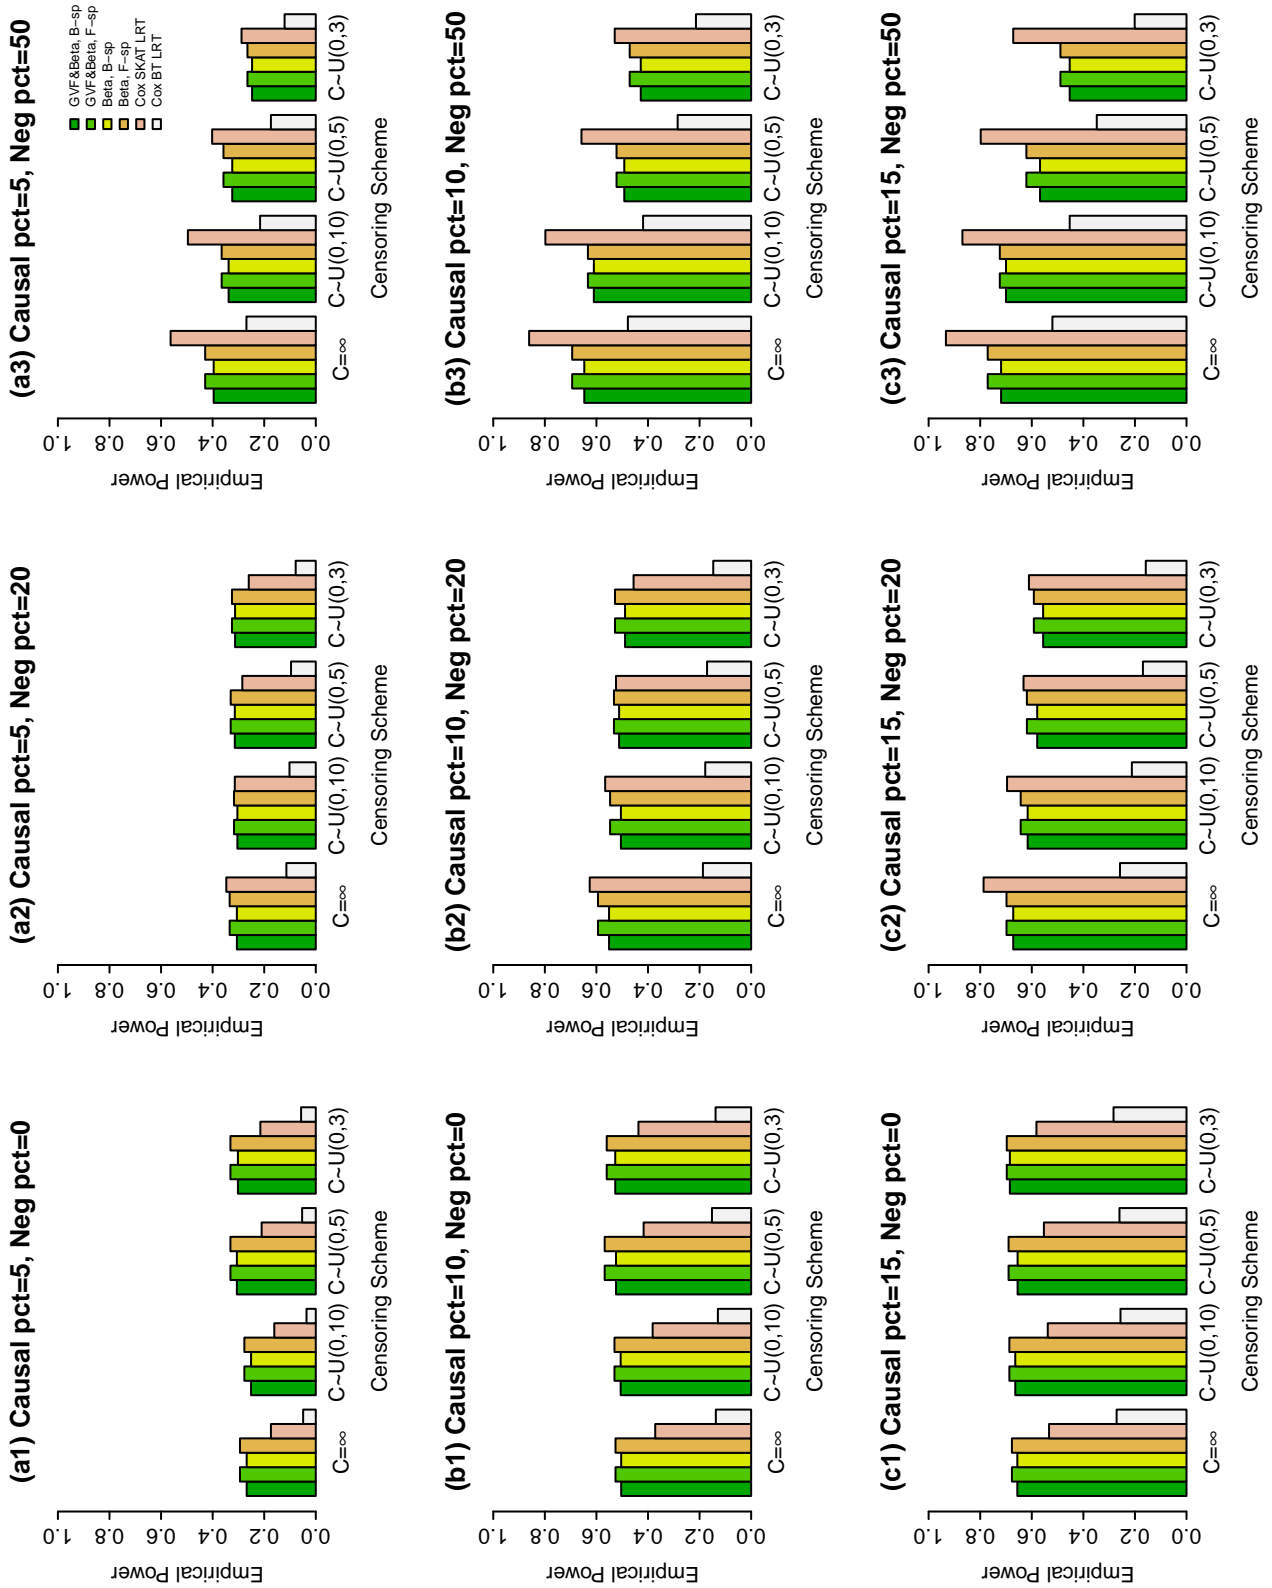

Figure A.2: The Empirical Power of the Cox FR LRT Statistics of the Cox Models (4) and (5) and Cox SKAT LRT and Cox BT LRT by Chen et al. (2014) at  $\alpha = 0.001$ , When All Causal Variants are Rare and a Sample Size of 2,000. When Neg pct = 0, All Causal Variants Had Positive Effects; When Neg pct = 20, Causal Variants Had Negative/Positive Effects; When Neg pct = 50, 50%/50% Causal Variants Had Negative/Positive Effects. The order of B-spline basis was 4, and the number of B-spline basis functions was  $K = K_\beta = 6$ ; the number of Fourier basis functions was  $K = K_\beta = 7$ .

Table A.3: **Empirical Type I Error Rates of the Cox FR LRT Statistics and Cox SKAT LRT, When All Variants in 6 kb Regions Were Used to Generate Genotype Data.** The order of B-spline basis was 4, and the number of B-spline basis functions was  $K = K_\beta = 8$ ; the number of Fourier basis functions was  $K = K_\beta = 9$ . The results of Cox SKAT LRT were from R SeqMeta package by Chen et al. (2014)

| Sample Size<br>$n$ | The Censoring Scheme | Number of Simulations | Nominal Level<br>$\alpha$ | Cox FR LRT Statistics            |                       |                           |                       | Cox SKAT LRT          |
|--------------------|----------------------|-----------------------|---------------------------|----------------------------------|-----------------------|---------------------------|-----------------------|-----------------------|
|                    |                      |                       |                           | Basis of both GVF and $\beta(u)$ |                       | Basis of beta-Smooth Only |                       |                       |
|                    |                      |                       |                           | B-sp Basis                       | Fourier Basis         | B-sp Basis                | Fourier Basis         |                       |
| 1,000              | $\infty$             | 1,200,000             | 0.05                      | 0.05415                          | 0.05442               | 0.05415                   | 0.05442               | 0.06914               |
|                    |                      |                       | $10^{-3}$                 | 0.00116                          | 0.00115               | 0.00116                   | 0.00115               | 0.00182               |
|                    |                      |                       | $10^{-4}$                 | 0.00013                          | 0.00012               | 0.00013                   | 0.00012               | 0.00021               |
|                    |                      |                       | $10^{-5}$                 | $1.17 \times 10^{-5}$            | $9.17 \times 10^{-6}$ | $1.17 \times 10^{-5}$     | $9.17 \times 10^{-6}$ | $2.75 \times 10^{-5}$ |
|                    | $U(0, 10)$           | 1,200,000             | 0.05                      | 0.05475                          | 0.05471               | 0.05475                   | 0.05471               | 0.07243               |
|                    |                      |                       | $10^{-3}$                 | 0.00119                          | 0.00119               | 0.00119                   | 0.00119               | 0.00185               |
|                    |                      |                       | $10^{-4}$                 | 0.00013                          | 0.00013               | 0.00013                   | 0.00013               | 0.00019               |
|                    |                      |                       | $10^{-5}$                 | $1.33 \times 10^{-5}$            | $9.17 \times 10^{-6}$ | $1.33 \times 10^{-5}$     | $9.17 \times 10^{-6}$ | $1.50 \times 10^{-5}$ |
|                    | $U(0, 5)$            | 1,200,000             | 0.05                      | 0.05555                          | 0.05485               | 0.05556                   | 0.05485               | 0.07733               |
|                    |                      |                       | $10^{-3}$                 | 0.00122                          | 0.00116               | 0.00122                   | 0.00116               | 0.00199               |
|                    |                      |                       | $10^{-4}$                 | 0.00013                          | 0.00011               | 0.00014                   | 0.00011               | 0.00021               |
|                    |                      |                       | $10^{-5}$                 | $1.67 \times 10^{-5}$            | $1.17 \times 10^{-5}$ | $1.75 \times 10^{-5}$     | $1.17 \times 10^{-5}$ | $1.83 \times 10^{-5}$ |
| $U(0, 3)$          | 1,100,000            | 0.05                  | 0.05758                   | 0.05629                          | 0.05761               | 0.05629                   | 0.08144               |                       |
|                    |                      | $10^{-3}$             | 0.00131                   | 0.00126                          | 0.00131               | 0.00126                   | 0.00195               |                       |
|                    |                      | $10^{-4}$             | 0.00015                   | 0.00014                          | 0.00015               | 0.00014                   | 0.00021               |                       |
|                    |                      | $10^{-5}$             | $1.91 \times 10^{-5}$     | $1.45 \times 10^{-5}$            | $1.91 \times 10^{-5}$ | $1.45 \times 10^{-5}$     | $1.91 \times 10^{-5}$ |                       |
| 2,000              | $\infty$             | 1,200,000             | 0.05                      | 0.05263                          | 0.05252               | 0.05263                   | 0.05252               | 0.06213               |
|                    |                      |                       | $10^{-3}$                 | 0.00112                          | 0.00110               | 0.00112                   | 0.00110               | 0.00142               |
|                    |                      |                       | $10^{-4}$                 | 0.00011                          | 0.00013               | 0.00011                   | 0.00013               | 0.00016               |
|                    |                      |                       | $10^{-5}$                 | $9.17 \times 10^{-6}$            | $1.42 \times 10^{-5}$ | $9.17 \times 10^{-6}$     | $1.42 \times 10^{-5}$ | $2.08 \times 10^{-5}$ |
|                    | $U(0, 10)$           | 1,200,000             | 0.05                      | 0.05220                          | 0.05215               | 0.05220                   | 0.05215               | 0.06411               |
|                    |                      |                       | $10^{-3}$                 | 0.00112                          | 0.00108               | 0.00112                   | 0.00108               | 0.00153               |
|                    |                      |                       | $10^{-4}$                 | 0.00012                          | 0.00013               | 0.00012                   | 0.00013               | 0.00015               |
|                    |                      |                       | $10^{-5}$                 | $1.75 \times 10^{-5}$            | $1.33 \times 10^{-5}$ | $1.75 \times 10^{-5}$     | $1.33 \times 10^{-5}$ | $2.33 \times 10^{-5}$ |
|                    | $U(0, 5)$            | 1,100,000             | 0.05                      | 0.05298                          | 0.05271               | 0.05298                   | 0.05271               | 0.06786               |
|                    |                      |                       | $10^{-3}$                 | 0.00115                          | 0.00107               | 0.00115                   | 0.00107               | 0.00155               |
|                    |                      |                       | $10^{-4}$                 | 0.00013                          | 0.00010               | 0.00013                   | 0.00010               | 0.00016               |
|                    |                      |                       | $10^{-5}$                 | $1.36 \times 10^{-5}$            | $1.27 \times 10^{-5}$ | $1.36 \times 10^{-5}$     | $1.27 \times 10^{-5}$ | $2.72 \times 10^{-5}$ |
| $U(0, 3)$          | 1,200,000            | 0.05                  | 0.05381                   | 0.05294                          | 0.05382               | 0.05294                   | 0.07222               |                       |
|                    |                      | $10^{-3}$             | 0.00121                   | 0.00113                          | 0.00121               | 0.00113                   | 0.00164               |                       |
|                    |                      | $10^{-4}$             | 0.00014                   | 0.00012                          | 0.00014               | 0.00012                   | 0.00017               |                       |
|                    |                      | $10^{-5}$             | $1.33 \times 10^{-5}$     | $1.33 \times 10^{-5}$            | $1.33 \times 10^{-5}$ | $1.33 \times 10^{-5}$     | $1.25 \times 10^{-5}$ |                       |
| 3,000              | $\infty$             | 1,200,000             | 0.05                      | 0.05152                          | 0.05148               | 0.05152                   | 0.05148               | 0.05969               |
|                    |                      |                       | $10^{-3}$                 | 0.00107                          | 0.00106               | 0.00107                   | 0.00106               | 0.00137               |
|                    |                      |                       | $10^{-4}$                 | 0.00012                          | 0.00012               | 0.00012                   | 0.00012               | 0.00012               |
|                    |                      |                       | $10^{-5}$                 | $1.00 \times 10^{-5}$            | $7.50 \times 10^{-6}$ | $1.00 \times 10^{-5}$     | $7.50 \times 10^{-6}$ | $1.67 \times 10^{-5}$ |
|                    | $U(0, 10)$           | 1,200,000             | 0.05                      | 0.05188                          | 0.05144               | 0.05188                   | 0.05144               | 0.06066               |
|                    |                      |                       | $10^{-3}$                 | 0.00105                          | 0.00106               | 0.00105                   | 0.00106               | 0.00139               |
|                    |                      |                       | $10^{-4}$                 | 0.00011                          | 0.00011               | 0.00011                   | 0.00011               | 0.00016               |
|                    |                      |                       | $10^{-5}$                 | $5.83 \times 10^{-6}$            | $1.08 \times 10^{-5}$ | $5.83 \times 10^{-6}$     | $1.08 \times 10^{-5}$ | $1.83 \times 10^{-5}$ |
|                    | $U(0, 5)$            | 1,200,000             | 0.05                      | 0.05194                          | 0.05131               | 0.05194                   | 0.05131               | 0.06287               |
|                    |                      |                       | $10^{-3}$                 | 0.00109                          | 0.00105               | 0.00109                   | 0.00105               | 0.00145               |
|                    |                      |                       | $10^{-4}$                 | 0.00009                          | 0.00011               | 0.00009                   | 0.00011               | 0.00018               |
|                    |                      |                       | $10^{-5}$                 | $9.17 \times 10^{-6}$            | $1.00 \times 10^{-5}$ | $9.17 \times 10^{-6}$     | $1.00 \times 10^{-5}$ | $1.83 \times 10^{-5}$ |
| $U(0, 3)$          | 1,200,000            | 0.05                  | 0.05273                   | 0.05195                          | 0.05273               | 0.05195                   | 0.06735               |                       |
|                    |                      | $10^{-3}$             | 0.00108                   | 0.00110                          | 0.00108               | 0.00110                   | 0.00156               |                       |
|                    |                      | $10^{-4}$             | 0.00012                   | 0.00011                          | 0.00012               | 0.00011                   | 0.00016               |                       |
|                    |                      | $10^{-5}$             | $1.58 \times 10^{-5}$     | $1.17 \times 10^{-5}$            | $1.58 \times 10^{-5}$ | $1.17 \times 10^{-5}$     | $1.33 \times 10^{-5}$ |                       |
| 4,000              | $\infty$             | 1,200,000             | 0.05                      | 0.05087                          | 0.05103               | 0.05087                   | 0.05103               | 0.05753               |
|                    |                      |                       | $10^{-3}$                 | 0.00104                          | 0.00106               | 0.00104                   | 0.00106               | 0.00127               |
|                    |                      |                       | $10^{-4}$                 | 0.00010                          | 0.00009               | 0.00010                   | 0.00009               | 0.00014               |
|                    |                      |                       | $10^{-5}$                 | $1.00 \times 10^{-5}$            | $1.33 \times 10^{-5}$ | $1.00 \times 10^{-5}$     | $1.33 \times 10^{-5}$ | $1.42 \times 10^{-5}$ |
|                    | $U(0, 10)$           | 1,200,000             | 0.05                      | 0.05109                          | 0.05106               | 0.05109                   | 0.05106               | 0.05863               |
|                    |                      |                       | $10^{-3}$                 | 0.00105                          | 0.00108               | 0.00105                   | 0.00108               | 0.00131               |
|                    |                      |                       | $10^{-4}$                 | 0.00014                          | 0.00012               | 0.00014                   | 0.00012               | 0.00014               |
|                    |                      |                       | $10^{-5}$                 | $8.33 \times 10^{-6}$            | $6.67 \times 10^{-6}$ | $8.33 \times 10^{-6}$     | $6.67 \times 10^{-6}$ | $1.58 \times 10^{-5}$ |
|                    | $U(0, 5)$            | 1,200,000             | 0.05                      | 0.05148                          | 0.05124               | 0.05148                   | 0.05124               | 0.06078               |
|                    |                      |                       | $10^{-3}$                 | 0.00106                          | 0.00106               | 0.00106                   | 0.00106               | 0.00133               |
|                    |                      |                       | $10^{-4}$                 | 0.00011                          | 0.00011               | 0.00011                   | 0.00011               | 0.00012               |
|                    |                      |                       | $10^{-5}$                 | $8.33 \times 10^{-6}$            | $7.50 \times 10^{-6}$ | $8.33 \times 10^{-6}$     | $7.50 \times 10^{-6}$ | $1.58 \times 10^{-5}$ |
| $U(0, 3)$          | 1,200,000            | 0.05                  | 0.05198                   | 0.05153                          | 0.05198               | 0.05153                   | 0.06455               |                       |
|                    |                      | $10^{-3}$             | 0.00108                   | 0.00109                          | 0.00108               | 0.00109                   | 0.00136               |                       |
|                    |                      | $10^{-4}$             | 0.00010                   | 0.00010                          | 0.00010               | 0.00010                   | 0.00014               |                       |
|                    |                      | $10^{-5}$             | $8.33 \times 10^{-6}$     | $7.50 \times 10^{-6}$            | $8.33 \times 10^{-6}$ | $7.50 \times 10^{-6}$     | $1.75 \times 10^{-5}$ |                       |

Table A.4: **Empirical Type I Error Rates of the Cox FR LRT Statistics and Cox SKAT LRT, When Only Rare Variants in 6 kb Regions Were Used to Generate Genotype Data.** The order of B-spline basis was 4, and the number of B-spline basis functions was  $K = K_\beta = 8$ ; the number of Fourier basis functions was  $K = K_\beta = 9$ . The results of Cox SKAT LRT were from R SeqMeta package by Chen et al. (2014).

| Sample Size<br>$n$ | The Censoring Scheme | Number of Simulations | Nominal Level<br>$\alpha$ | Cox FR LRT Statistics            |                       |                           |                       | Cox SKAT LRT          |
|--------------------|----------------------|-----------------------|---------------------------|----------------------------------|-----------------------|---------------------------|-----------------------|-----------------------|
|                    |                      |                       |                           | Basis of both GVF and $\beta(u)$ |                       | Basis of beta-Smooth Only |                       |                       |
|                    |                      |                       |                           | B-sp Basis                       | Fourier Basis         | B-sp Basis                | Fourier Basis         |                       |
| 1,000              | $\infty$             | 1,100,000             | 0.05                      | 0.05602                          | 0.05629               | 0.05602                   | 0.05629               | 0.07169               |
|                    |                      |                       | $10^{-3}$                 | 0.00126                          | 0.00128               | 0.00126                   | 0.00128               | 0.00195               |
|                    |                      |                       | $10^{-4}$                 | 0.00013                          | 0.00013               | 0.00013                   | 0.00013               | 0.00022               |
|                    |                      |                       | $10^{-5}$                 | $9.09 \times 10^{-6}$            | $1.72 \times 10^{-5}$ | $9.09 \times 10^{-6}$     | $1.72 \times 10^{-5}$ | $2.63 \times 10^{-5}$ |
|                    | $U(0, 10)$           | 900,000               | 0.05                      | 0.05738                          | 0.05675               | 0.05739                   | 0.05675               | 0.07505               |
|                    |                      |                       | $10^{-3}$                 | 0.00125                          | 0.00127               | 0.00125                   | 0.00127               | 0.00194               |
|                    |                      |                       | $10^{-4}$                 | 0.00013                          | 0.00014               | 0.00013                   | 0.00014               | 0.00021               |
|                    |                      |                       | $10^{-5}$                 | $1.78 \times 10^{-5}$            | $1.89 \times 10^{-5}$ | $1.78 \times 10^{-5}$     | $1.89 \times 10^{-5}$ | $1.56 \times 10^{-5}$ |
|                    | $U(0, 5)$            | 800,000               | 0.05                      | 0.05950                          | 0.05819               | 0.05951                   | 0.05819               | 0.08059               |
|                    |                      |                       | $10^{-3}$                 | 0.00136                          | 0.00129               | 0.00136                   | 0.00129               | 0.00219               |
|                    |                      |                       | $10^{-4}$                 | 0.00016                          | 0.00015               | 0.00016                   | 0.00015               | 0.00022               |
|                    |                      |                       | $10^{-5}$                 | $2.25 \times 10^{-5}$            | $1.63 \times 10^{-5}$ | $2.25 \times 10^{-5}$     | $1.63 \times 10^{-5}$ | $2.38 \times 10^{-5}$ |
| $U(0, 3)$          | 600,000              | 0.05                  | 0.06461                   | 0.06237                          | 0.06476               | 0.06237                   | 0.08430               |                       |
|                    |                      | $10^{-3}$             | 0.00162                   | 0.00154                          | 0.00163               | 0.00154                   | 0.00205               |                       |
|                    |                      | $10^{-4}$             | 0.00018                   | 0.00016                          | 0.00018               | 0.00016                   | 0.00020               |                       |
|                    |                      | $10^{-5}$             | $1.67 \times 10^{-5}$     | $2.00 \times 10^{-5}$            | $1.67 \times 10^{-5}$ | $2.00 \times 10^{-5}$     | $2.00 \times 10^{-5}$ |                       |
| 2,000              | $\infty$             | 1,200,000             | 0.05                      | 0.05305                          | 0.05299               | 0.05305                   | 0.05299               | 0.06348               |
|                    |                      |                       | $10^{-3}$                 | 0.00109                          | 0.00108               | 0.00109                   | 0.00108               | 0.00150               |
|                    |                      |                       | $10^{-4}$                 | 0.00011                          | 0.00011               | 0.00011                   | 0.00011               | 0.00016               |
|                    |                      |                       | $10^{-5}$                 | $1.17 \times 10^{-5}$            | $9.17 \times 10^{-6}$ | $1.17 \times 10^{-5}$     | $9.17 \times 10^{-6}$ | $2.08 \times 10^{-5}$ |
|                    | $U(0, 10)$           | 1,200,000             | 0.05                      | 0.05369                          | 0.05344               | 0.05369                   | 0.05344               | 0.06542               |
|                    |                      |                       | $10^{-3}$                 | 0.00117                          | 0.00118               | 0.00117                   | 0.00118               | 0.00161               |
|                    |                      |                       | $10^{-4}$                 | 0.00014                          | 0.00011               | 0.00014                   | 0.00011               | 0.00017               |
|                    |                      |                       | $10^{-5}$                 | $2.00 \times 10^{-5}$            | $1.08 \times 10^{-5}$ | $2.00 \times 10^{-5}$     | $1.08 \times 10^{-5}$ | $2.33 \times 10^{-5}$ |
|                    | $U(0, 5)$            | 1,100,000             | 0.05                      | 0.05498                          | 0.05432               | 0.05498                   | 0.05432               | 0.06926               |
|                    |                      |                       | $10^{-3}$                 | 0.00123                          | 0.00115               | 0.00123                   | 0.00115               | 0.00163               |
|                    |                      |                       | $10^{-4}$                 | 0.00013                          | 0.00012               | 0.00013                   | 0.00012               | 0.00017               |
|                    |                      |                       | $10^{-5}$                 | $1.27 \times 10^{-5}$            | $1.27 \times 10^{-5}$ | $1.27 \times 10^{-5}$     | $1.27 \times 10^{-5}$ | $2.81 \times 10^{-5}$ |
| $U(0, 3)$          | 100,000              | 0.05                  | 0.05778                   | 0.05608                          | 0.05778               | 0.05608                   | 0.07419               |                       |
|                    |                      | $10^{-3}$             | 0.00126                   | 0.00116                          | 0.00126               | 0.00116                   | 0.00159               |                       |
|                    |                      | $10^{-4}$             | 0.00017                   | 0.00011                          | 0.00017               | 0.00011                   | 0.00012               |                       |
|                    |                      | $10^{-5}$             | $1.00 \times 10^{-5}$     | $2.00 \times 10^{-5}$            | $1.00 \times 10^{-5}$ | $2.00 \times 10^{-5}$     | 0                     |                       |
| 3,000              | $\infty$             | 1,200,000             | 0.05                      | 0.05243                          | 0.05223               | 0.05243                   | 0.05223               | 0.06058               |
|                    |                      |                       | $10^{-3}$                 | 0.00110                          | 0.00108               | 0.00110                   | 0.00108               | 0.00140               |
|                    |                      |                       | $10^{-4}$                 | 0.00013                          | 0.00010               | 0.00013                   | 0.00010               | 0.00015               |
|                    |                      |                       | $10^{-5}$                 | $1.08 \times 10^{-5}$            | $5.83 \times 10^{-6}$ | $1.08 \times 10^{-5}$     | $5.83 \times 10^{-6}$ | $1.50 \times 10^{-5}$ |
|                    | $U(0, 10)$           | 1,200,000             | 0.05                      | 0.05232                          | 0.05189               | 0.05232                   | 0.05189               | 0.06161               |
|                    |                      |                       | $10^{-3}$                 | 0.00109                          | 0.00109               | 0.00109                   | 0.00109               | 0.00146               |
|                    |                      |                       | $10^{-4}$                 | 0.00011                          | 0.00010               | 0.00011                   | 0.00010               | 0.00015               |
|                    |                      |                       | $10^{-5}$                 | $1.42 \times 10^{-5}$            | $1.17 \times 10^{-5}$ | $1.42 \times 10^{-5}$     | $1.17 \times 10^{-5}$ | $2.00 \times 10^{-5}$ |
|                    | $U(0, 5)$            | 1,200,000             | 0.05                      | 0.05333                          | 0.05256               | 0.05333                   | 0.05256               | 0.06425               |
|                    |                      |                       | $10^{-3}$                 | 0.00111                          | 0.00110               | 0.00111                   | 0.00110               | 0.00150               |
|                    |                      |                       | $10^{-4}$                 | 0.00012                          | 0.00011               | 0.00012                   | 0.00011               | 0.00019               |
|                    |                      |                       | $10^{-5}$                 | $1.67 \times 10^{-5}$            | $1.25 \times 10^{-5}$ | $1.67 \times 10^{-5}$     | $1.25 \times 10^{-5}$ | $1.92 \times 10^{-5}$ |
| $U(0, 3)$          | 1,200,000            | 0.05                  | 0.05563                   | 0.05398                          | 0.05564               | 0.05398                   | 0.06887               |                       |
|                    |                      | $10^{-3}$             | 0.00119                   | 0.00117                          | 0.00119               | 0.00117                   | 0.00159               |                       |
|                    |                      | $10^{-4}$             | 0.00011                   | 0.00011                          | 0.00011               | 0.00011                   | 0.00015               |                       |
|                    |                      | $10^{-5}$             | $1.17 \times 10^{-5}$     | $2.50 \times 10^{-5}$            | $1.17 \times 10^{-5}$ | $2.50 \times 10^{-5}$     | $1.33 \times 10^{-5}$ |                       |
| 4,000              | $\infty$             | 1,200,000             | 0.05                      | 0.05161                          | 0.05148               | 0.05161                   | 0.05148               | 0.05825               |
|                    |                      |                       | $10^{-3}$                 | 0.00109                          | 0.00111               | 0.00109                   | 0.00111               | 0.00130               |
|                    |                      |                       | $10^{-4}$                 | 0.00012                          | 0.00013               | 0.00012                   | 0.00013               | 0.00014               |
|                    |                      |                       | $10^{-5}$                 | $1.67 \times 10^{-5}$            | $1.83 \times 10^{-5}$ | $1.67 \times 10^{-5}$     | $1.83 \times 10^{-5}$ | $1.83 \times 10^{-5}$ |
|                    | $U(0, 10)$           | 1,200,000             | 0.05                      | 0.05168                          | 0.05131               | 0.05168                   | 0.05131               | 0.05932               |
|                    |                      |                       | $10^{-3}$                 | 0.00103                          | 0.00107               | 0.00103                   | 0.00107               | 0.00130               |
|                    |                      |                       | $10^{-4}$                 | 0.00011                          | 0.00010               | 0.00011                   | 0.00010               | 0.00015               |
|                    |                      |                       | $10^{-5}$                 | $1.25 \times 10^{-5}$            | $1.67 \times 10^{-5}$ | $1.25 \times 10^{-5}$     | $1.67 \times 10^{-5}$ | $1.42 \times 10^{-5}$ |
|                    | $U(0, 5)$            | 1,200,000             | 0.05                      | 0.05270                          | 0.05227               | 0.05270                   | 0.05227               | 0.06173               |
|                    |                      |                       | $10^{-3}$                 | 0.00110                          | 0.00108               | 0.00110                   | 0.00108               | 0.00138               |
|                    |                      |                       | $10^{-4}$                 | 0.00010                          | 0.00011               | 0.00010                   | 0.00011               | 0.00012               |
|                    |                      |                       | $10^{-5}$                 | $8.33 \times 10^{-6}$            | $7.50 \times 10^{-6}$ | $8.33 \times 10^{-6}$     | $7.50 \times 10^{-6}$ | $1.17 \times 10^{-5}$ |
| $U(0, 3)$          | 1,200,000            | 0.05                  | 0.05379                   | 0.05326                          | 0.05379               | 0.05326                   | 0.06585               |                       |
|                    |                      | $10^{-3}$             | 0.00114                   | 0.00112                          | 0.00114               | 0.00112                   | 0.00140               |                       |
|                    |                      | $10^{-4}$             | 0.00012                   | 0.00012                          | 0.00012               | 0.00012                   | 0.00014               |                       |
|                    |                      | $10^{-5}$             | $1.58 \times 10^{-5}$     | $1.08 \times 10^{-5}$            | $1.58 \times 10^{-5}$ | $1.08 \times 10^{-5}$     | $1.58 \times 10^{-5}$ |                       |



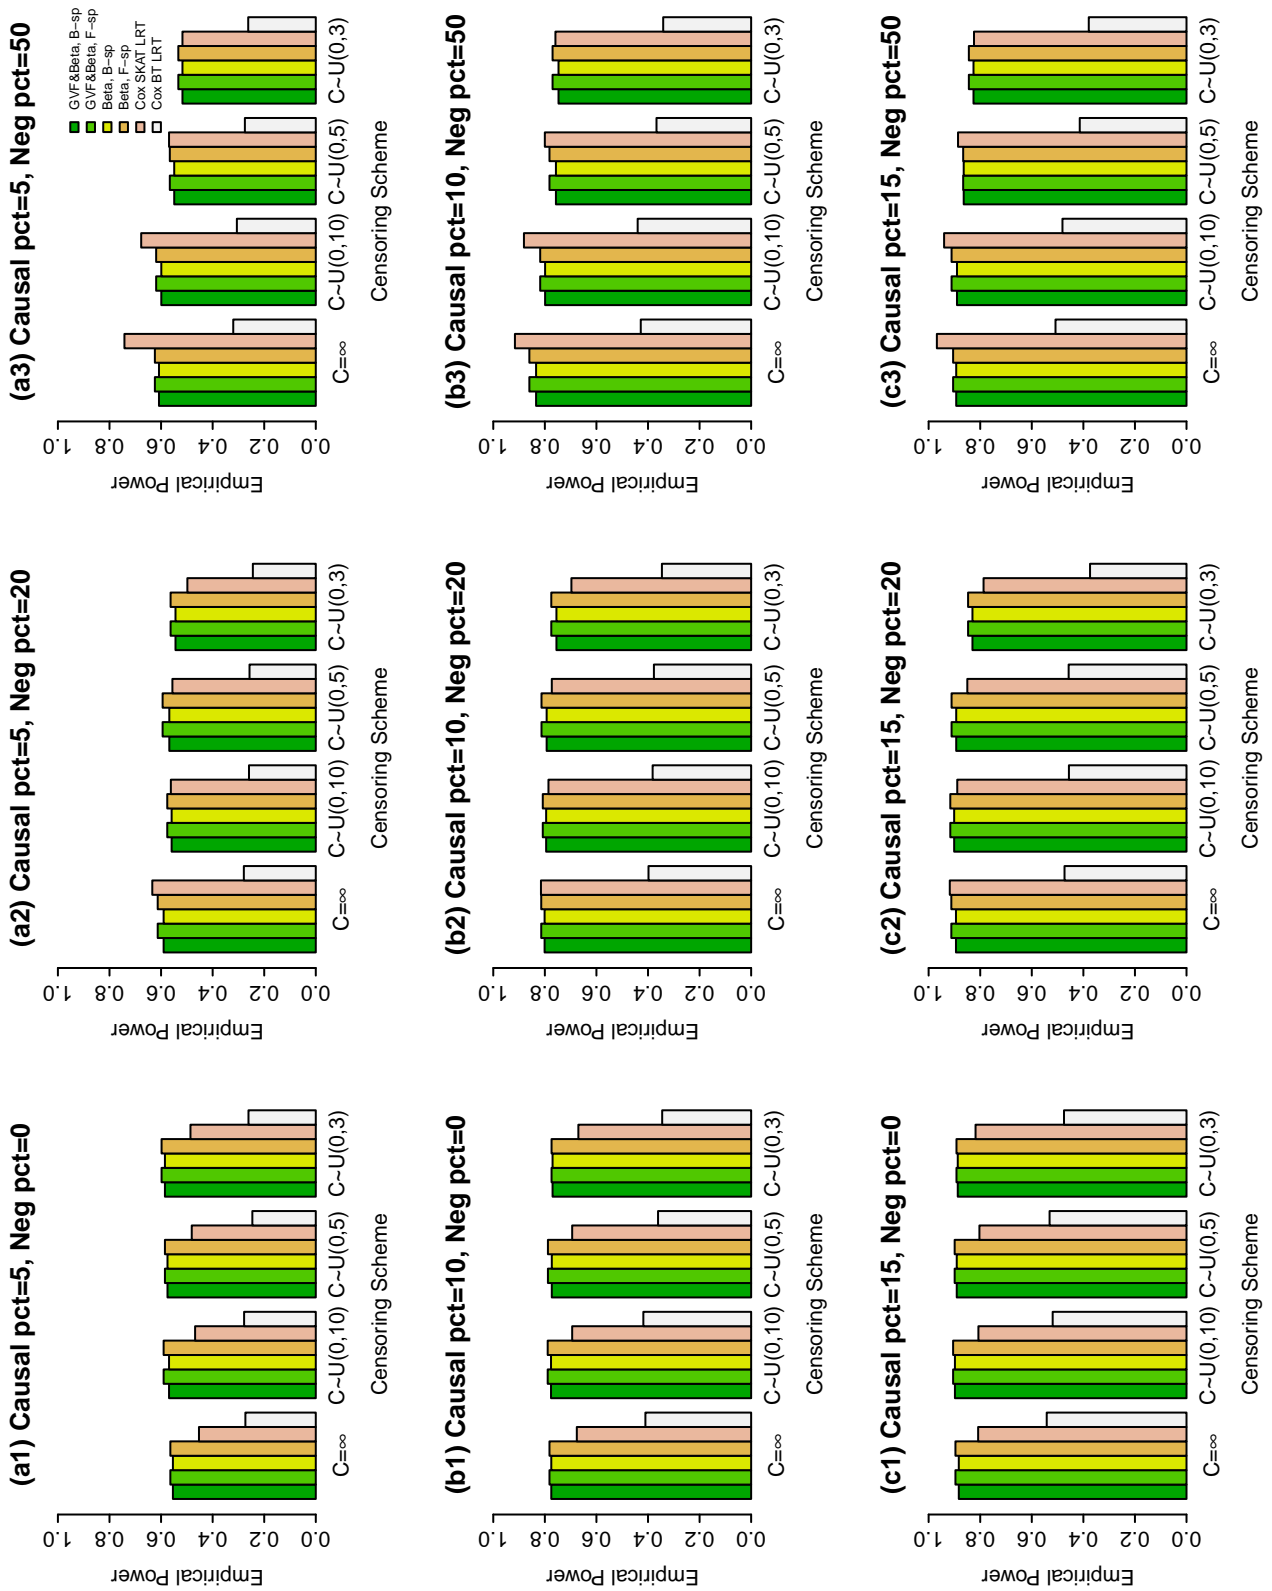

Figure A.3: The Empirical Power of the Cox FR LRT Statistics of the Cox Models (4) and (5) and Cox SKAT LRT and Cox BT LRT by Chen et al. (2014) at  $\alpha = 0.001$ , When Some Causal Variants are Rare and Some are Common and a Sample Size of 2,000. When Neg pct = 0, All Causal Variants Had Positive Effects; When Neg pct = 20, 20%/80% Causal Variants Had Negative/Positive Effects; When Neg pct = 50, 50%/50% Causal Variants Had Negative/Positive Effects. The order of B-spline basis was 4, and the number of B-spline basis functions was  $K = K_\beta = 8$ ; the number of Fourier basis functions was  $K = K_\beta = 9$ .

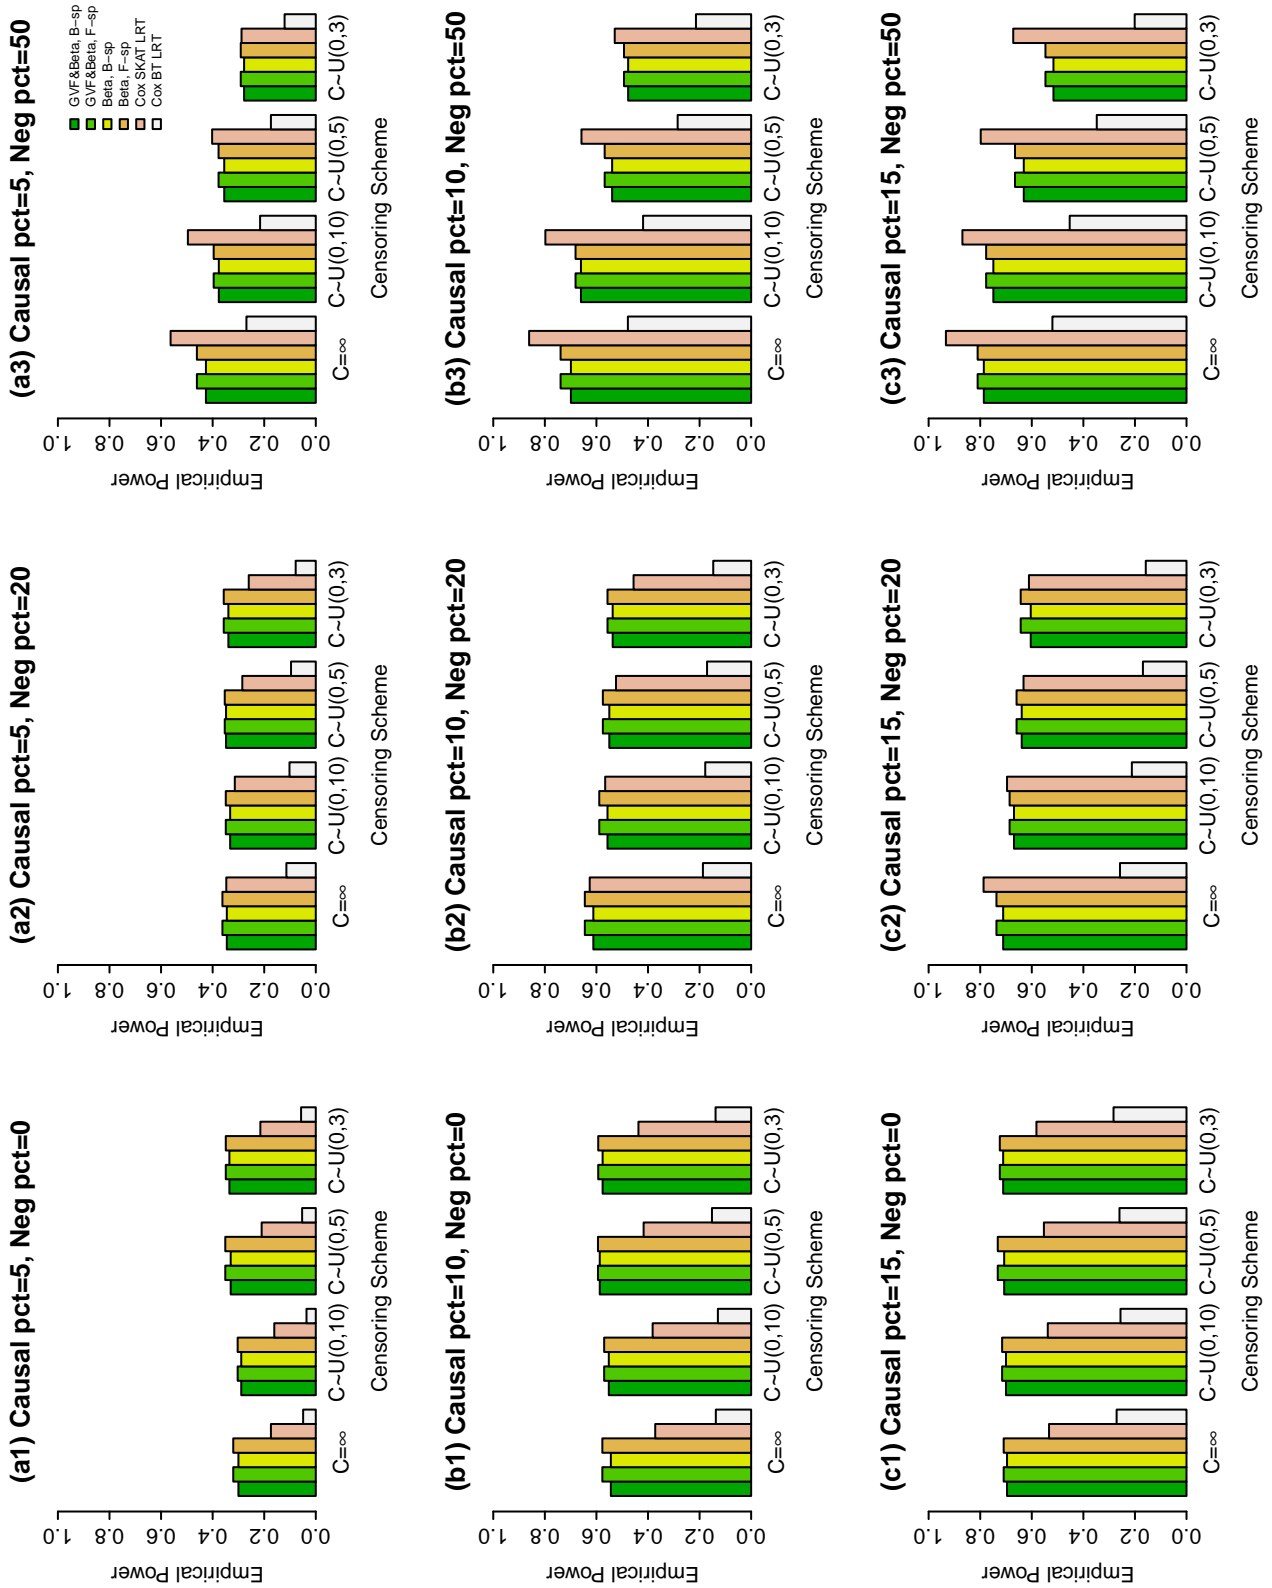

Figure A.4: The Empirical Power of the Cox FR LRT Statistics of the Cox Models (4) and (5) and Cox SKAT LRT and Cox BT LRT by Chen et al. (2014) at  $\alpha = 0.001$ , When All Causal Variants are Rare and a Sample Size of 2,000. When Neg pct = 0, All Causal Variants Had Positive Effects; When Neg pct = 20, Causal Variants Had Negative/Positive Effects; When Neg pct = 50, 50%/50% Causal Variants Had Negative/Positive Effects. The order of B-spline basis was 4, and the number of B-spline basis functions was  $K = K_\beta = 8$ ; the number of Fourier basis functions was  $K = K_\beta = 9$ .

Table A.5: Empirical Type I Error Rates of the Cox FR LRT Statistics and Cox SKAT LRT, When All Variants in 6 kb Regions Were Used to Generate Genotype Data. The order of B-spline basis was 4, and the number of B-spline basis functions was  $K = K_\beta = 12$ ; the number of Fourier basis functions was  $K = K_\beta = 13$ . The results of Cox SKAT LRT were from R SeqMeta package by Chen et al. (2014)

| Sample Size<br>$n$ | The Censoring Scheme | Number of Simulations | Nominal Level<br>$\alpha$ | Cox FR LRT Statistics            |                       |                           |                       | Cox SKAT LRT          |                       |
|--------------------|----------------------|-----------------------|---------------------------|----------------------------------|-----------------------|---------------------------|-----------------------|-----------------------|-----------------------|
|                    |                      |                       |                           | Basis of both GVF and $\beta(u)$ |                       | Basis of beta-Smooth Only |                       |                       |                       |
|                    |                      |                       |                           | B-sp Basis                       | Fourier Basis         | B-sp Basis                | Fourier Basis         |                       |                       |
| 1,000              | $\infty$             | 900,000               | 0.05                      | 0.05748                          | 0.05719               | 0.05752                   | 0.05719               | 0.06950               |                       |
|                    |                      |                       | $10^{-3}$                 | 0.00127                          | 0.00127               | 0.00127                   | 0.00127               | 0.00185               |                       |
|                    |                      |                       | $10^{-4}$                 | 0.00013                          | 0.00013               | 0.00013                   | 0.00013               | 0.00021               |                       |
|                    |                      |                       | $10^{-5}$                 | $1.00 \times 10^{-5}$            | $1.00 \times 10^{-5}$ | $1.00 \times 10^{-5}$     | $1.00 \times 10^{-5}$ | $2.67 \times 10^{-5}$ |                       |
|                    | $U(0, 10)$           | 100,000               | 0.05                      | 0.05906                          | 0.05809               | 0.05911                   | 0.05809               | 0.07252               |                       |
|                    |                      |                       | $10^{-3}$                 | 0.00136                          | 0.00142               | 0.00137                   | 0.00142               | 0.00187               |                       |
| $10^{-4}$          |                      |                       | 0.00015                   | 0.00013                          | 0.00015               | 0.00013                   | 0.00015               |                       |                       |
|                    |                      |                       | $10^{-5}$                 | $2.00 \times 10^{-5}$            | $1.00 \times 10^{-5}$ | $2.00 \times 10^{-5}$     | $1.00 \times 10^{-5}$ | $1.00 \times 10^{-5}$ |                       |
| 2,000              | $\infty$             | 1,800,000             | 0.05                      | 0.05390                          | 0.05347               | 0.05390                   | 0.05347               | 0.06203               |                       |
|                    |                      |                       | $10^{-3}$                 | 0.00116                          | 0.00116               | 0.00116                   | 0.00116               | 0.00146               |                       |
|                    |                      |                       | $10^{-4}$                 | 0.00012                          | 0.00012               | 0.00012                   | 0.00012               | 0.00016               |                       |
|                    |                      |                       | $10^{-4}$                 | 0.00012                          | 0.00012               | 0.00012                   | 0.00012               | 0.00016               |                       |
|                    |                      |                       |                           | $10^{-5}$                        | $1.88 \times 10^{-5}$ | $1.38 \times 10^{-5}$     | $1.88 \times 10^{-5}$ | $1.38 \times 10^{-5}$ | $2.11 \times 10^{-5}$ |
|                    | $U(0, 10)$           | 800,000               | 0.05                      | 0.05463                          | 0.05405               | 0.05464                   | 0.05405               | 0.06406               |                       |
|                    |                      |                       | $10^{-3}$                 | 0.00121                          | 0.00122               | 0.00121                   | 0.00122               | 0.00152               |                       |
|                    |                      |                       | $10^{-4}$                 | 0.00012                          | 0.00010               | 0.00012                   | 0.00010               | 0.00016               |                       |
|                    |                      |                       | $10^{-5}$                 | $1.25 \times 10^{-5}$            | $8.75 \times 10^{-6}$ | $1.25 \times 10^{-5}$     | $8.75 \times 10^{-6}$ | $1.75 \times 10^{-5}$ |                       |
|                    | $U(0, 5)$            | 400,000               | 0.05                      | 0.05610                          | 0.05516               | 0.05614                   | 0.05516               | 0.06826               |                       |
|                    |                      |                       | $10^{-3}$                 | 0.00119                          | 0.00115               | 0.00119                   | 0.00115               | 0.00150               |                       |
|                    |                      |                       | $10^{-4}$                 | 0.00013                          | 0.00012               | 0.00013                   | 0.00012               | 0.00018               |                       |
| $10^{-5}$          |                      |                       | $1.00 \times 10^{-5}$     | 0                                | $1.00 \times 10^{-5}$ | 0                         | $2.25 \times 10^{-5}$ |                       |                       |
| 3,000              | $\infty$             | 2,200,000             | 0.05                      | 0.05270                          | 0.05233               | 0.05270                   | 0.05233               | 0.05952               |                       |
|                    |                      |                       | $10^{-3}$                 | 0.00112                          | 0.00110               | 0.00112                   | 0.00110               | 0.00137               |                       |
|                    |                      |                       | $10^{-4}$                 | 0.00010                          | 0.00011               | 0.00010                   | 0.00011               | 0.00013               |                       |
|                    |                      |                       | $10^{-5}$                 | $1.27 \times 10^{-5}$            | $1.36 \times 10^{-5}$ | $1.27 \times 10^{-5}$     | $1.36 \times 10^{-5}$ | $1.86 \times 10^{-5}$ |                       |
|                    | $U(0, 10)$           | 2,100,000             | 0.05                      | 0.05289                          | 0.05256               | 0.05289                   | 0.05256               | 0.06040               |                       |
|                    |                      |                       | $10^{-3}$                 | 0.00113                          | 0.00111               | 0.00113                   | 0.00111               | 0.00136               |                       |
|                    |                      |                       | $10^{-4}$                 | 0.00011                          | 0.00010               | 0.00011                   | 0.00010               | 0.00014               |                       |
|                    |                      |                       | $10^{-5}$                 | $1.14 \times 10^{-5}$            | $1.19 \times 10^{-5}$ | $1.14 \times 10^{-5}$     | $1.19 \times 10^{-5}$ | $1.38 \times 10^{-5}$ |                       |
|                    | $U(0, 5)$            | 1,900,000             | 0.05                      | 0.05411                          | 0.05309               | 0.05412                   | 0.05309               | 0.06313               |                       |
|                    |                      |                       | $10^{-3}$                 | 0.00117                          | 0.00113               | 0.00117                   | 0.00113               | 0.00145               |                       |
|                    |                      |                       | $10^{-4}$                 | 0.00012                          | 0.00011               | 0.00012                   | 0.00011               | 0.00016               |                       |
|                    |                      |                       | $10^{-5}$                 | $1.00 \times 10^{-5}$            | $1.10 \times 10^{-5}$ | $1.00 \times 10^{-5}$     | $1.10 \times 10^{-5}$ | $1.36 \times 10^{-5}$ |                       |
|                    | $U(0, 3)$            | 600,000               | 0.05                      | 0.05641                          | 0.05476               | 0.05646                   | 0.05476               | 0.06780               |                       |
|                    |                      |                       | $10^{-3}$                 | 0.00119                          | 0.00110               | 0.00119                   | 0.00110               | 0.00155               |                       |
|                    |                      |                       | $10^{-4}$                 | 0.00010                          | 0.00011               | 0.00010                   | 0.00011               | 0.00017               |                       |
|                    |                      |                       | $10^{-5}$                 | $1.00 \times 10^{-5}$            | $5.00 \times 10^{-6}$ | $1.00 \times 10^{-5}$     | $5.00 \times 10^{-6}$ | $1.33 \times 10^{-5}$ |                       |
| 4,000              | $\infty$             | 2,200,000             | 0.05                      | 0.05188                          | 0.05172               | 0.05188                   | 0.05172               | 0.05752               |                       |
|                    |                      |                       | $10^{-3}$                 | 0.00107                          | 0.00106               | 0.00107                   | 0.00106               | 0.00127               |                       |
|                    |                      |                       | $10^{-4}$                 | 0.00011                          | 0.00012               | 0.00011                   | 0.00012               | 0.00015               |                       |
|                    |                      |                       | $10^{-5}$                 | $1.40 \times 10^{-5}$            | $1.50 \times 10^{-5}$ | $1.40 \times 10^{-5}$     | $1.50 \times 10^{-5}$ | $1.13 \times 10^{-5}$ |                       |
|                    | $U(0, 10)$           | 2,400,000             | 0.05                      | 0.05217                          | 0.05182               | 0.05217                   | 0.05182               | 0.05861               |                       |
|                    |                      |                       | $10^{-3}$                 | 0.00114                          | 0.00113               | 0.00114                   | 0.00113               | 0.00132               |                       |
|                    |                      |                       | $10^{-4}$                 | 0.00013                          | 0.00011               | 0.00013                   | 0.00011               | 0.00014               |                       |
|                    |                      |                       | $10^{-5}$                 | $8.75 \times 10^{-6}$            | $1.62 \times 10^{-5}$ | $8.75 \times 10^{-6}$     | $1.62 \times 10^{-5}$ | $1.67 \times 10^{-5}$ |                       |
|                    | $U(0, 5)$            | 1,600,000             | 0.05                      | 0.05282                          | 0.05225               | 0.05283                   | 0.05225               | 0.06079               |                       |
|                    |                      |                       | $10^{-3}$                 | 0.00110                          | 0.00107               | 0.00110                   | 0.00107               | 0.00134               |                       |
|                    |                      |                       | $10^{-4}$                 | 0.00010                          | 0.00012               | 0.00010                   | 0.00012               | 0.00014               |                       |
|                    |                      |                       | $10^{-5}$                 | $1.25 \times 10^{-5}$            | $1.18 \times 10^{-5}$ | $1.25 \times 10^{-5}$     | $1.18 \times 10^{-5}$ | $1.56 \times 10^{-5}$ |                       |
|                    | $U(0, 3)$            | 1,400,000             | 0.05                      | 0.05435                          | 0.05318               | 0.05437                   | 0.05318               | 0.06459               |                       |
|                    |                      |                       | $10^{-3}$                 | 0.00124                          | 0.00120               | 0.00125                   | 0.00120               | 0.00138               |                       |
|                    |                      |                       | $10^{-4}$                 | 0.00013                          | 0.00013               | 0.00013                   | 0.00013               | 0.00014               |                       |
|                    |                      |                       | $10^{-5}$                 | $1.14 \times 10^{-5}$            | $1.07 \times 10^{-5}$ | $1.14 \times 10^{-5}$     | $1.07 \times 10^{-5}$ | $1.85 \times 10^{-5}$ |                       |

Table A.6: **Empirical Type I Error Rates of the Cox FR LRT Statistics and Cox SKAT LRT, When Only Rare Variants in 6 kb Regions Were Used to Generate Genotype Data.** The order of B-spline basis was 4, and the number of B-spline basis functions was  $K = K_\beta = 12$ ; the number of Fourier basis functions was  $K = K_\beta = 13$ . The results of Cox SKAT LRT were from R SeqMeta package by Chen et al. (2014).

| Sample Size<br>$n$ | The Censoring Scheme | Number of Simulations | Nominal Level<br>$\alpha$ | Cox FR LRT Statistics            |                       |                           |                       | Cox SKAT LRT          |
|--------------------|----------------------|-----------------------|---------------------------|----------------------------------|-----------------------|---------------------------|-----------------------|-----------------------|
|                    |                      |                       |                           | Basis of both GVF and $\beta(u)$ |                       | Basis of beta-Smooth Only |                       |                       |
|                    |                      |                       |                           | B-sp Basis                       | Fourier Basis         | B-sp Basis                | Fourier Basis         |                       |
| 1,000              | $\infty$             | 100,000               | 0.05                      | 0.06052                          | 0.06091               | 0.06060                   | 0.06091               | 0.07265               |
|                    |                      |                       | 0.01                      | 0.01358                          | 0.01313               | 0.01360                   | 0.01313               | 0.017                 |
|                    |                      |                       | $10^{-3}$                 | 0.00154                          | 0.00156               | 0.00155                   | 0.00156               | 0.00184               |
|                    |                      |                       | $10^{-4}$                 | 0.00014                          | 0.00014               | 0.00015                   | 0.00014               | 0.00024               |
|                    |                      |                       | $10^{-5}$                 | 0                                | 0                     | 0                         | 0                     | $1.00 \times 10^{-5}$ |
| 1,500              | $\infty$             | 400,000               | 0.05                      | 0.05758                          | 0.05677               | 0.05758                   | 0.05677               | 0.06718               |
|                    |                      |                       | 0.01                      | 0.01242                          | 0.01204               | 0.01242                   | 0.01204               | 0.01525               |
|                    |                      |                       | $10^{-3}$                 | 0.00136                          | 0.00130               | 0.00136                   | 0.00130               | 0.00166               |
|                    |                      |                       | $10^{-4}$                 | 0.00015                          | 0.00015               | 0.00015                   | 0.00015               | 0.00017               |
|                    |                      |                       | $10^{-5}$                 | $7.50 \times 10^{-6}$            | $1.00 \times 10^{-5}$ | $7.50 \times 10^{-6}$     | $1.00 \times 10^{-5}$ | $1.50 \times 10^{-5}$ |
| 2,000              | $\infty$             | 1,300,000             | 0.05                      | 0.05535                          | 0.05486               | 0.05535                   | 0.05486               | 0.06322               |
|                    |                      |                       | 0.01                      | 0.01160                          | 0.01132               | 0.01160                   | 0.01132               | 0.01379               |
|                    |                      |                       | $10^{-3}$                 | 0.00124                          | 0.00114               | 0.00124                   | 0.00114               | 0.00154               |
|                    |                      |                       | $10^{-4}$                 | 0.00013                          | 0.00013               | 0.00013                   | 0.00013               | 0.00016               |
|                    |                      |                       | $10^{-5}$                 | $1.00 \times 10^{-5}$            | $1.69 \times 10^{-5}$ | $1.00 \times 10^{-5}$     | $1.69 \times 10^{-5}$ | $2.00 \times 10^{-5}$ |
| 2,500              | $\infty$             | 1,700,000             | 0.05                      | 0.05473                          | 0.05421               | 0.05473                   | 0.05421               | 0.06183               |
|                    |                      |                       | 0.01                      | 0.01144                          | 0.01108               | 0.01144                   | 0.01108               | 0.01340               |
|                    |                      |                       | $10^{-3}$                 | 0.00117                          | 0.00120               | 0.00117                   | 0.00120               | 0.00150               |
|                    |                      |                       | $10^{-4}$                 | 0.00013                          | 0.00013               | 0.00013                   | 0.00013               | 0.00017               |
|                    |                      |                       | $10^{-5}$                 | $1.76 \times 10^{-5}$            | $1.00 \times 10^{-5}$ | $1.76 \times 10^{-5}$     | $1.00 \times 10^{-5}$ | $1.35 \times 10^{-5}$ |
|                    | $U(0, 10)$           | 600,000               | 0.05                      | 0.05497                          | 0.05451               | 0.05497                   | 0.05451               | 0.06253               |
|                    |                      |                       | 0.01                      | 0.01143                          | 0.01124               | 0.01143                   | 0.01124               | 0.01343               |
|                    |                      |                       | $10^{-3}$                 | 0.00125                          | 0.00123               | 0.00125                   | 0.00123               | 0.00143               |
|                    |                      |                       | $10^{-4}$                 | 0.00014                          | 0.00015               | 0.00014                   | 0.00015               | 0.00014               |
|                    |                      |                       | $10^{-5}$                 | $1.67 \times 10^{-5}$            | $1.67 \times 10^{-5}$ | $1.67 \times 10^{-5}$     | $1.67 \times 10^{-5}$ | $1.83 \times 10^{-5}$ |
| 3,000              | $\infty$             | 1,900,000             | 0.05                      | 0.05393                          | 0.05334               | 0.05393                   | 0.05334               | 0.06031               |
|                    |                      |                       | 0.01                      | 0.01102                          | 0.01088               | 0.01102                   | 0.01088               | 0.01291               |
|                    |                      |                       | $10^{-3}$                 | 0.00117                          | 0.00113               | 0.00117                   | 0.00113               | 0.00139               |
|                    |                      |                       | $10^{-4}$                 | 0.00012                          | 0.00011               | 0.00012                   | 0.00011               | 0.00014               |
|                    |                      |                       | $10^{-5}$                 | $8.42 \times 10^{-6}$            | $1.05 \times 10^{-5}$ | $8.42 \times 10^{-6}$     | $1.05 \times 10^{-5}$ | $1.63 \times 10^{-5}$ |
|                    | $U(0, 10)$           | 1,000,000             | 0.05                      | 0.05388                          | 0.05329               | 0.05388                   | 0.05329               | 0.06133               |
|                    |                      |                       | 0.01                      | 0.01121                          | 0.01095               | 0.01121                   | 0.01095               | 0.01296               |
|                    |                      |                       | $10^{-3}$                 | 0.00121                          | 0.00117               | 0.00121                   | 0.00117               | 0.00142               |
|                    |                      |                       | $10^{-4}$                 | 0.00012                          | 0.00013               | 0.00012                   | 0.00013               | 0.00015               |
|                    |                      |                       | $10^{-5}$                 | $1.40 \times 10^{-5}$            | $2.40 \times 10^{-5}$ | $1.40 \times 10^{-5}$     | $2.40 \times 10^{-5}$ | $1.40 \times 10^{-5}$ |
|                    | $U(0, 5)$            | 200,000               | 0.05                      | 0.05474                          | 0.05466               | 0.05474                   | 0.05466               | 0.06376               |
|                    |                      |                       | 0.01                      | 0.01139                          | 0.01139               | 0.01140                   | 0.01139               | 0.01373               |
|                    |                      |                       | $10^{-3}$                 | 0.00119                          | 0.00126               | 0.00119                   | 0.00126               | 0.00154               |
|                    |                      |                       | $10^{-4}$                 | 0.00016                          | 0.00013               | 0.00016                   | 0.00013               | 0.00018               |
|                    |                      |                       | $10^{-5}$                 | $2.00 \times 10^{-5}$            | $1.50 \times 10^{-5}$ | $2.00 \times 10^{-5}$     | $1.50 \times 10^{-5}$ | $1.50 \times 10^{-5}$ |
| 4,000              | $\infty$             | 2,100,000             | 0.05                      | 0.05271                          | 0.05262               | 0.05271                   | 0.05262               | 0.05809               |
|                    |                      |                       | 0.01                      | 0.01076                          | 0.01074               | 0.01076                   | 0.01074               | 0.01218               |
|                    |                      |                       | $10^{-3}$                 | 0.00111                          | 0.00107               | 0.00111                   | 0.00107               | 0.00128               |
|                    |                      |                       | $10^{-4}$                 | 0.00012                          | 0.00011               | 0.00012                   | 0.00011               | 0.00015               |
|                    |                      |                       | $10^{-5}$                 | $1.33 \times 10^{-5}$            | $1.14 \times 10^{-5}$ | $1.33 \times 10^{-5}$     | $1.14 \times 10^{-5}$ | $1.47 \times 10^{-5}$ |
|                    | $U(0, 10)$           | 1,500,000             | 0.05                      | 0.05325                          | 0.05289               | 0.05325                   | 0.05289               | 0.05914               |
|                    |                      |                       | 0.01                      | 0.01101                          | 0.01074               | 0.01101                   | 0.01074               | 0.01244               |
|                    |                      |                       | $10^{-3}$                 | 0.00111                          | 0.00111               | 0.00111                   | 0.00111               | 0.00131               |
|                    |                      |                       | $10^{-4}$                 | 0.00010                          | 0.00011               | 0.00010                   | 0.00011               | 0.00014               |
|                    |                      |                       | $10^{-5}$                 | $1.26 \times 10^{-5}$            | $1.53 \times 10^{-5}$ | $1.26 \times 10^{-5}$     | $1.53 \times 10^{-5}$ | $1.93 \times 10^{-5}$ |
|                    | $U(0, 5)$            | 600,000               | 0.05                      | 0.05456                          | 0.05328               | 0.05456                   | 0.05328               | 0.06154               |
|                    |                      |                       | 0.01                      | 0.01103                          | 0.01093               | 0.01103                   | 0.01093               | 0.01265               |
|                    |                      |                       | $10^{-3}$                 | 0.00122                          | 0.00113               | 0.00122                   | 0.00113               | 0.00134               |
|                    |                      |                       | $10^{-4}$                 | 0.00012                          | 0.00012               | 0.00012                   | 0.00012               | 0.00014               |
|                    |                      |                       | $10^{-5}$                 | $1.83 \times 10^{-5}$            | $2.00 \times 10^{-5}$ | $1.83 \times 10^{-5}$     | $2.00 \times 10^{-5}$ | $2.00 \times 10^{-5}$ |

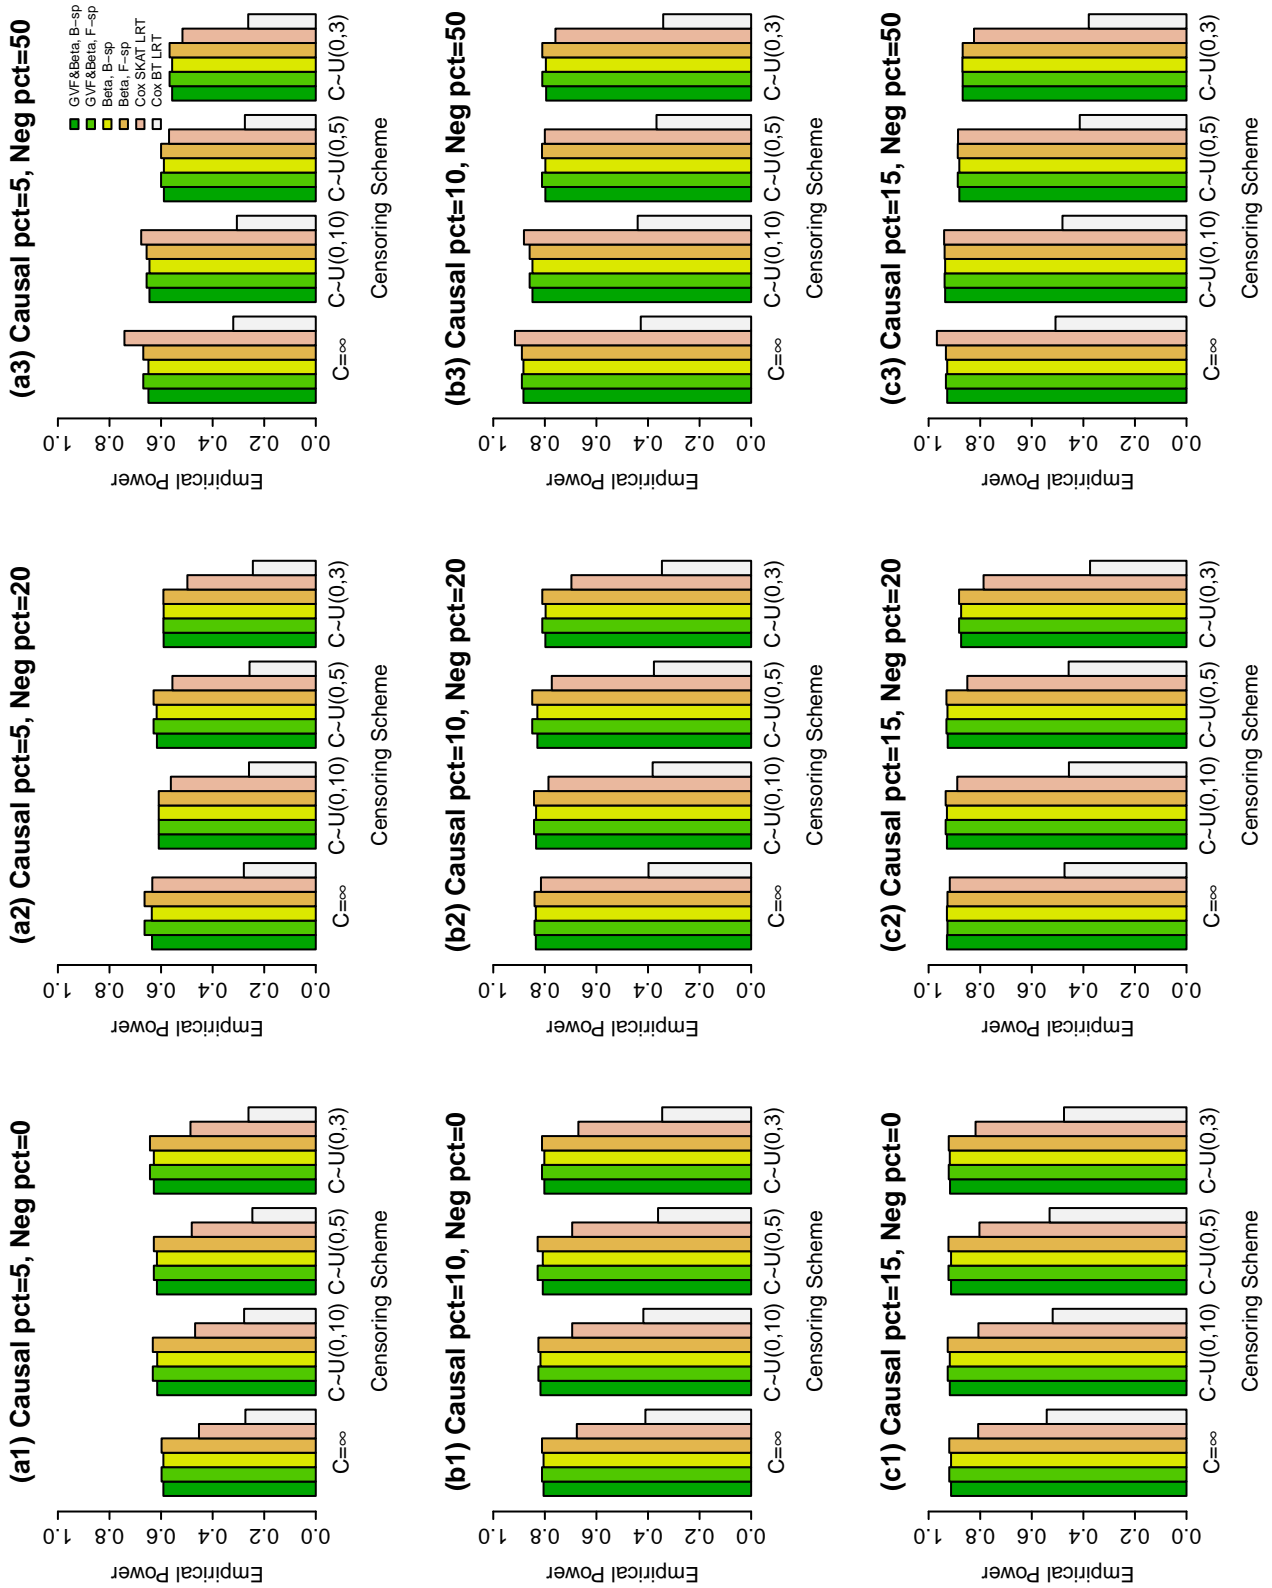

Figure A.5: The Empirical Power of the Cox FR LRT Statistics of the Cox Models (4) and (5) and Cox SKAT LRT and Cox BT LRT by Chen et al. (2014) at  $\alpha = 0.001$ , When Some Causal Variants are Rare and Some are Common and a Sample Size of 2,000. When Neg pct = 0, All Causal Variants Had Positive Effects; When Neg pct = 20, 20%/80% Causal Variants Had Negative/Positive Effects; When Neg pct = 50, 50%/50% Causal Variants Had Negative/Positive Effects. The order of B-spline basis was 4, and the number of B-spline basis functions was  $K = K_\beta = 12$ ; the number of Fourier basis functions was  $K = K_\beta = 13$ .

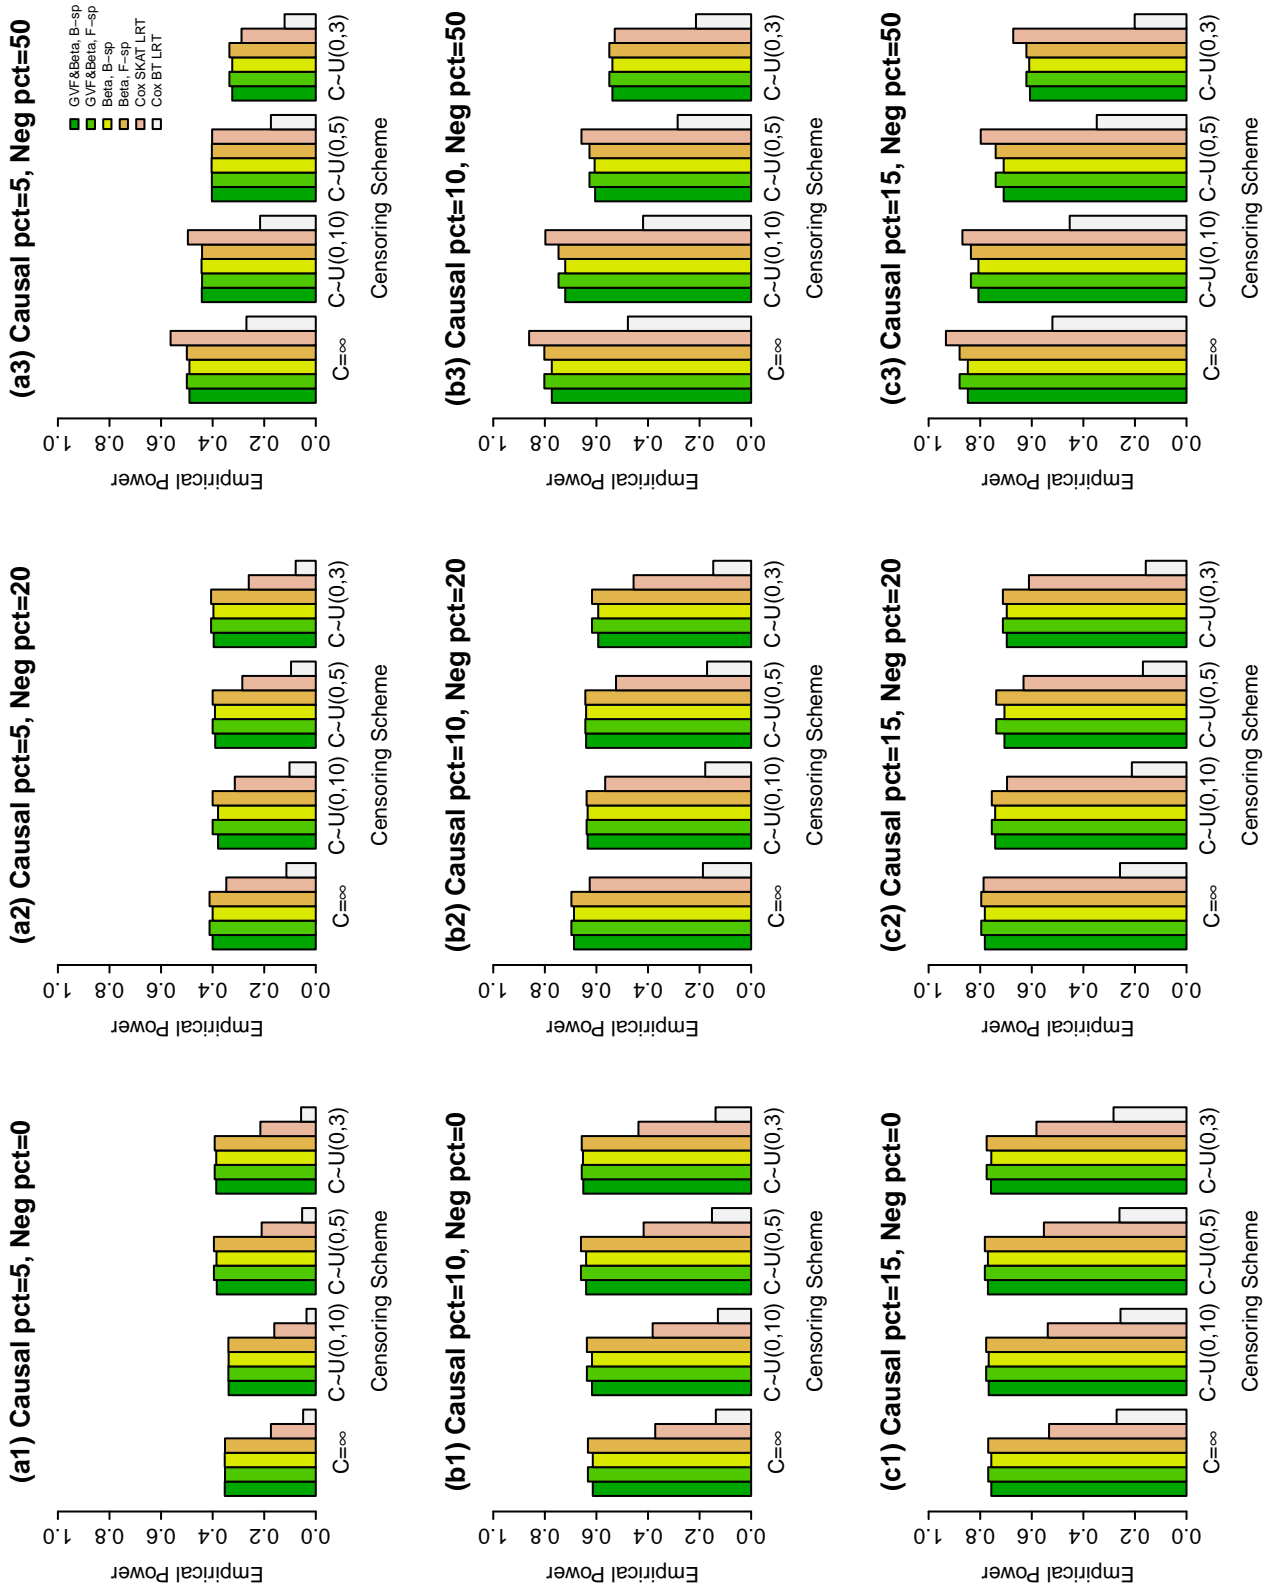

Figure A.6: The Empirical Power of the Cox FR LRT Statistics of the Cox Models (4) and (5) and Cox SKAT LRT and Cox BT LRT by Chen et al. (2014) at  $\alpha = 0.001$ , When All Causal Variants are Rare and a Sample Size of 2,000. When Neg pct = 0, All Causal Variants Had Positive Effects; When Neg pct = 20, 20%/80% Causal Variants Had Negative/Positive Effects; When Neg pct = 50, 50%/50% Causal Variants Had Negative/Positive Effects. The order of B-spline basis was 4, and the number of B-spline basis functions was  $K = K_\beta = 12$ ; the number of Fourier basis functions was  $K = K_\beta = 13$ .

# Web-based Supplementary Materials for “Gene-based Association Analysis for Censored Traits Via Fixed Effect Functional Regressions”

## Appendix B. More Simulation Results

In this **Supplementary Materials**, Appendix B, three more settings were considered: 30%, 40%, and 50% of variants were causal in the 6 kb subregion. When some causal variants are rare and some are common,  $c = \log(1.75)$ ,  $\log(1.50)$ , and  $\log(1.25)$  if 30%, 40%, and 50% of the variants were causal, respectively. When all causal variants are rare,  $c = \log(2.5)$ ,  $\log(2.0)$ , and  $\log(1.5)$  if 30%, 40%, and 50% of the variants were causal, respectively.

In Figures B.1, B.2, B.3, B.4, B.5, B.6, Figures B.7, and B.8, the range of parameters  $K$  and  $K_\beta$  are from 6 to 13 as those in the main text and **Supplementary Materials**, Appendix A. If some causal variants are rare and some are common, the Cox FR LRT statistics have higher or similar power as Cox SKAT LRT. If all causal variants are rare, the Cox FR LRT statistics have higher or similar power as Cox SKAT LRT except when 50%/50% causal variants had negative/positive effects. The Cox FR LRT statistics have higher power than Cox BT LRT in all the figures.

The power levels of Cox SKAT LRT are higher than those of Cox BT LRT except when 50% variants are causal and all causal variants had positive effects [graph (c1) in Figures B.1, B.2, B.3, B.4, B.5, B.6, B.7, and B.8]. This is consistent with the results of Chen et al. (2014).

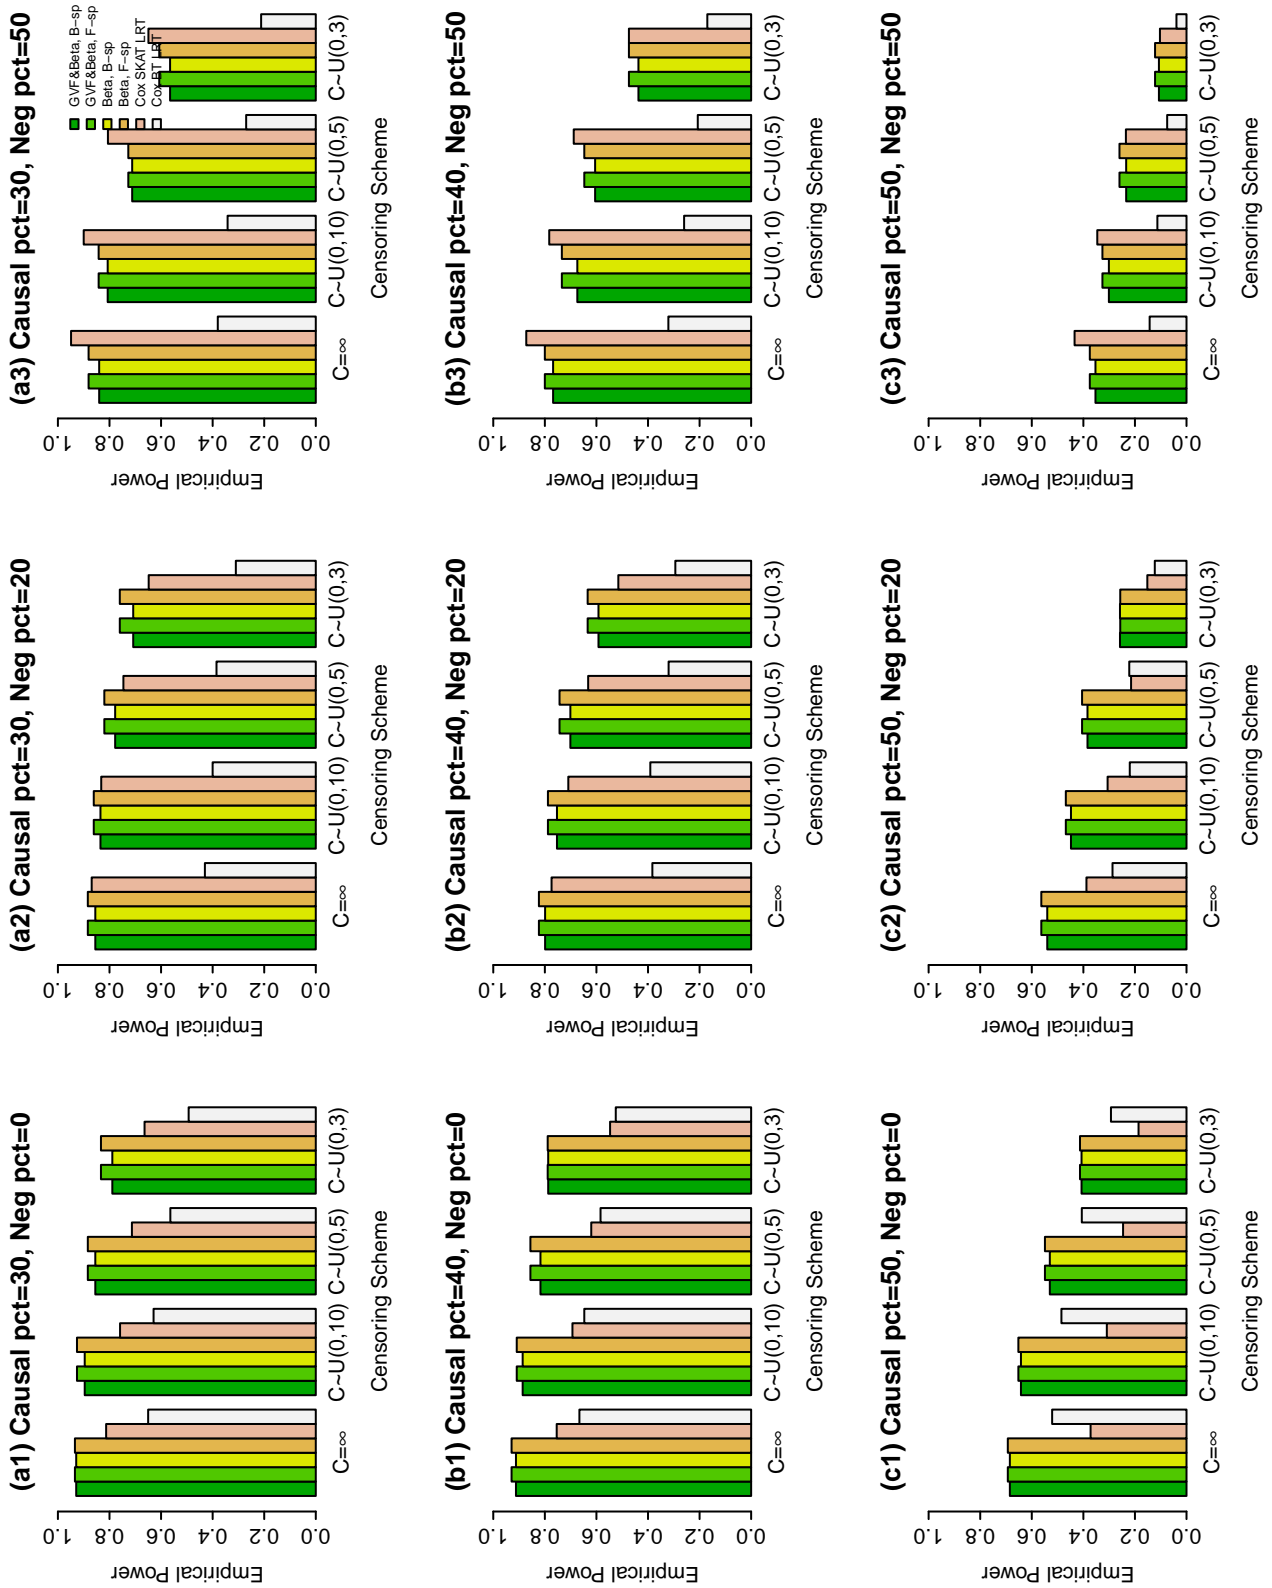

Figure B.1: The Empirical Power of the Cox FR LRT Statistics of the Cox Models (4) and (5) and Cox SKAT LRT and Cox BT LRT by Chen et al. (2014) at  $\alpha = 0.001$ , When Some Causal Variants are Rare and Some are Common and a Sample Size of 2,000. When Neg pct = 0, All Causal Variants Had Positive Effects; When Neg pct = 20, 20%/80% Causal Variants Had Negative/Positive Effects; When Neg pct = 50, 50%/50% Causal Variants Had Negative/Positive Effects. The order of B-spline basis was 4, and the number of B-spline basis functions was  $K = K_\beta = 6$ ; the number of Fourier basis functions was  $K = K_\beta = 7$ .



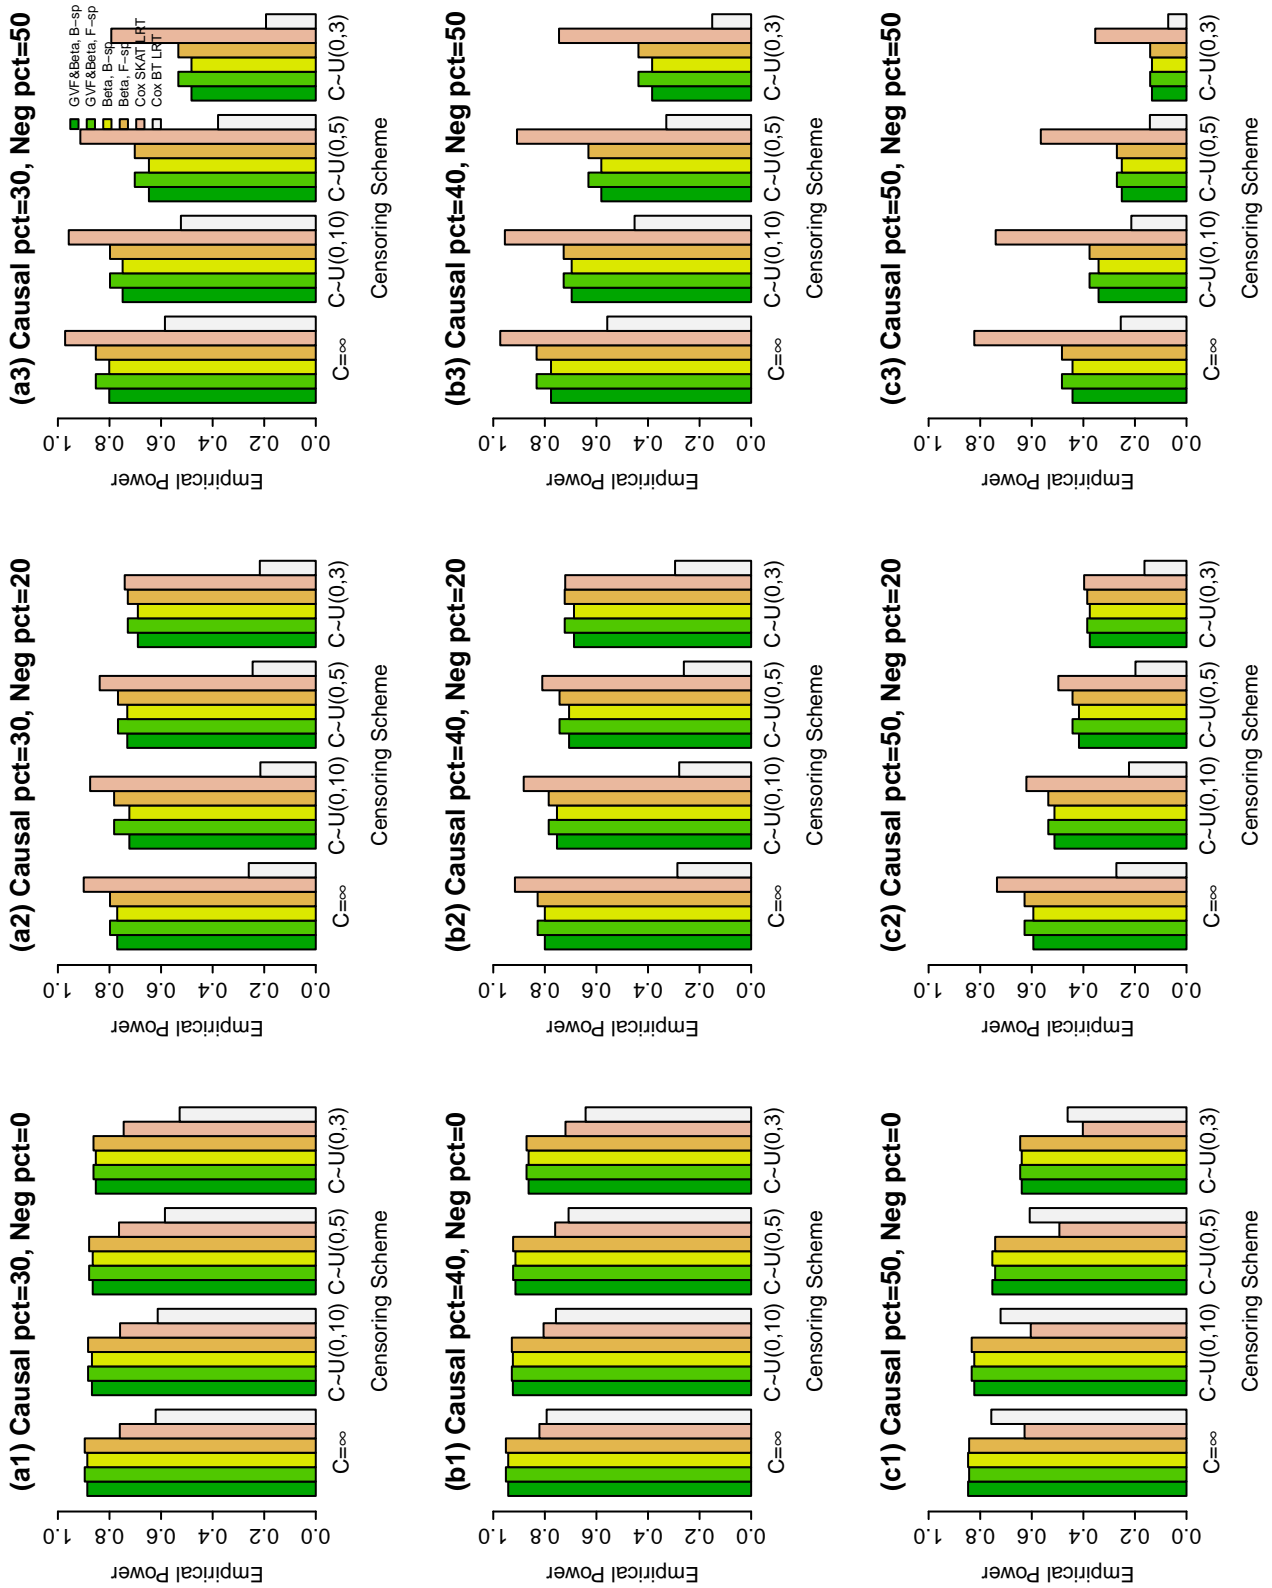

Figure B.2: The Empirical Power of the Cox FR LRT Statistics of the Cox Models (4) and (5) and Cox SKAT LRT and Cox BT LRT by Chen et al. (2014) at  $\alpha = 0.001$ , When All Causal Variants are Rare and a Sample Size of 2,000. When Neg pct = 0, All Causal Variants Had Positive Effects; When Neg pct = 20, 20%/80% Causal Variants Had Negative/Positive Effects; When Neg pct = 50, 50%/50% Causal Variants Had Negative/Positive Effects. The order of B-spline basis was 4, and the number of B-spline basis functions was  $K = K_\beta = 6$ ; the number of Fourier basis functions was  $K = K_\beta = 7$ .

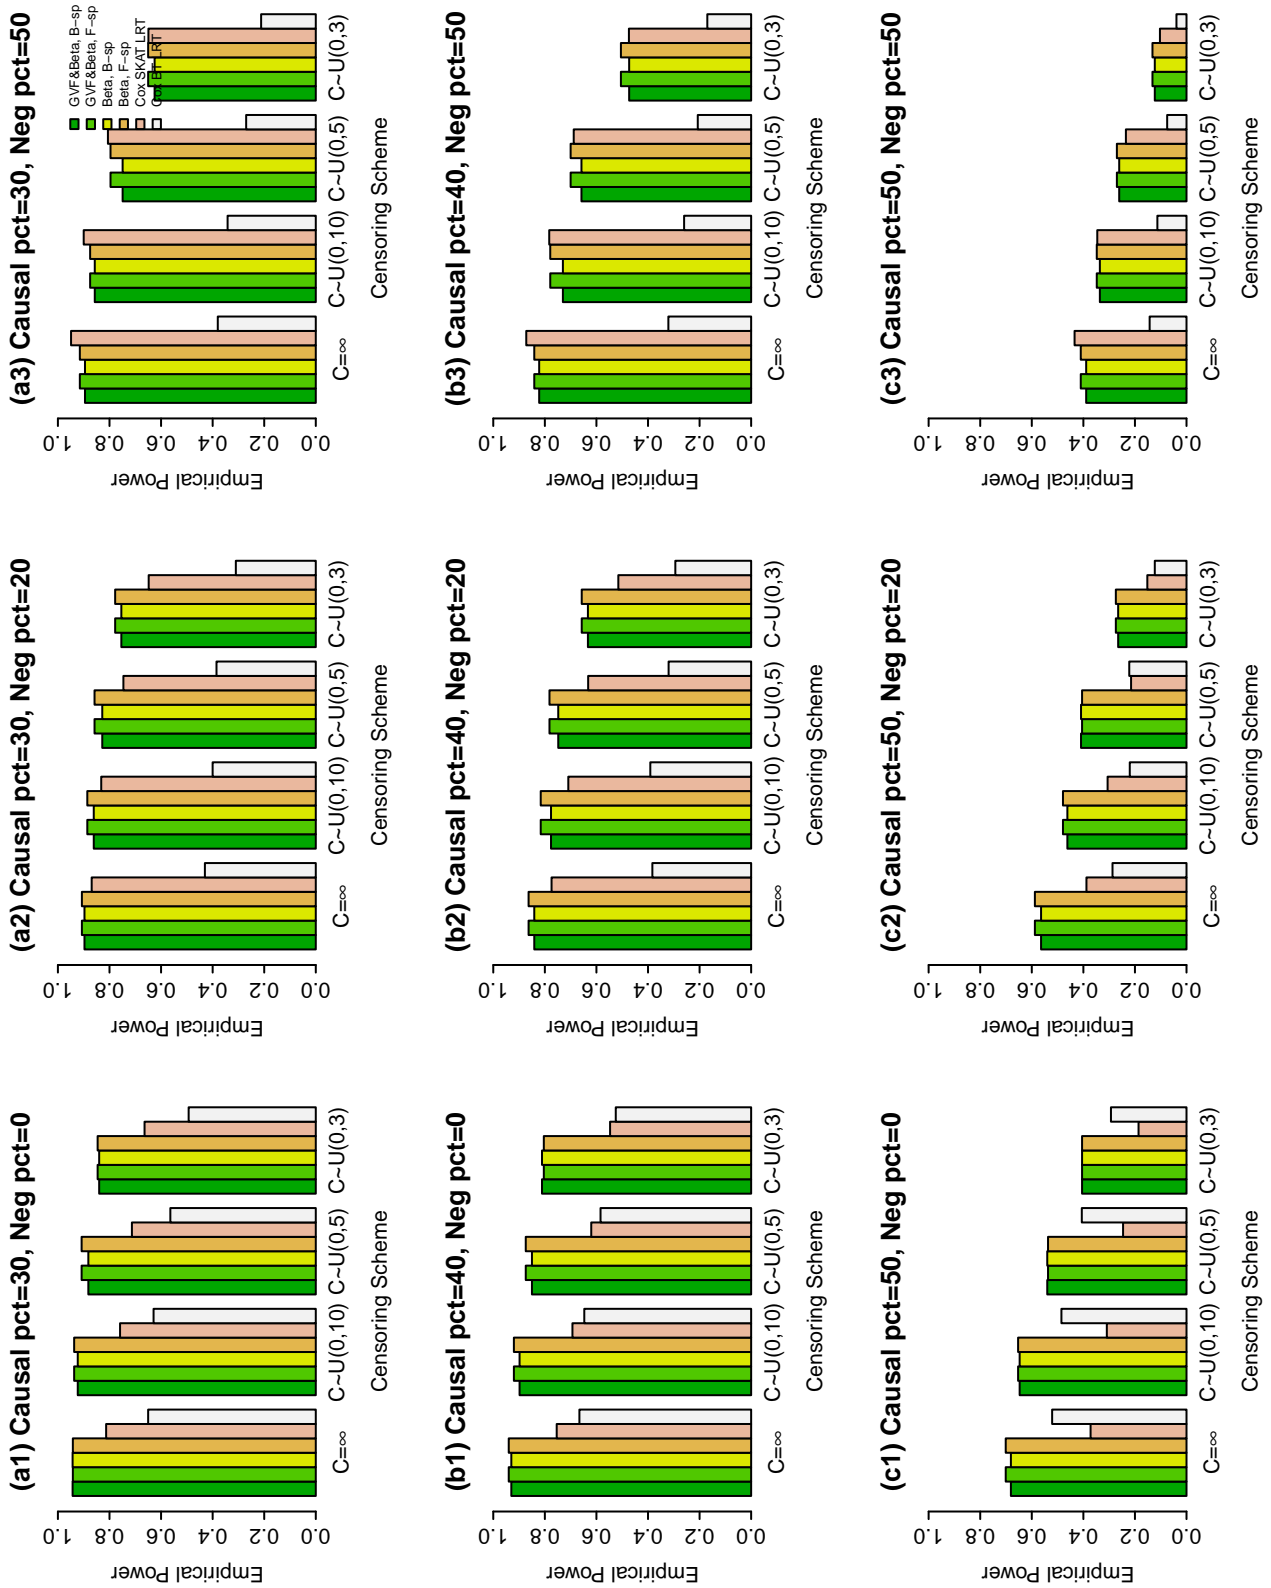

Figure B.3: The Empirical Power of the Cox FR LRT Statistics of the Cox Models (4) and (5) and Cox SKAT LRT and Cox BT LRT by Chen et al. (2014) at  $\alpha = 0.001$ , When Some Causal Variants are Rare and Some are Common and a Sample Size of 2,000. When Neg pct = 0, All Causal Variants Had Positive Effects; When Neg pct = 20, 20%/80% Causal Variants Had Negative/Positive Effects; When Neg pct = 50, 50%/50% Causal Variants Had Negative/Positive Effects. The order of B-spline basis was 4, and the number of B-spline basis functions was  $K = K_\beta = 8$ ; the number of Fourier basis functions was  $K = K_\beta = 9$ .

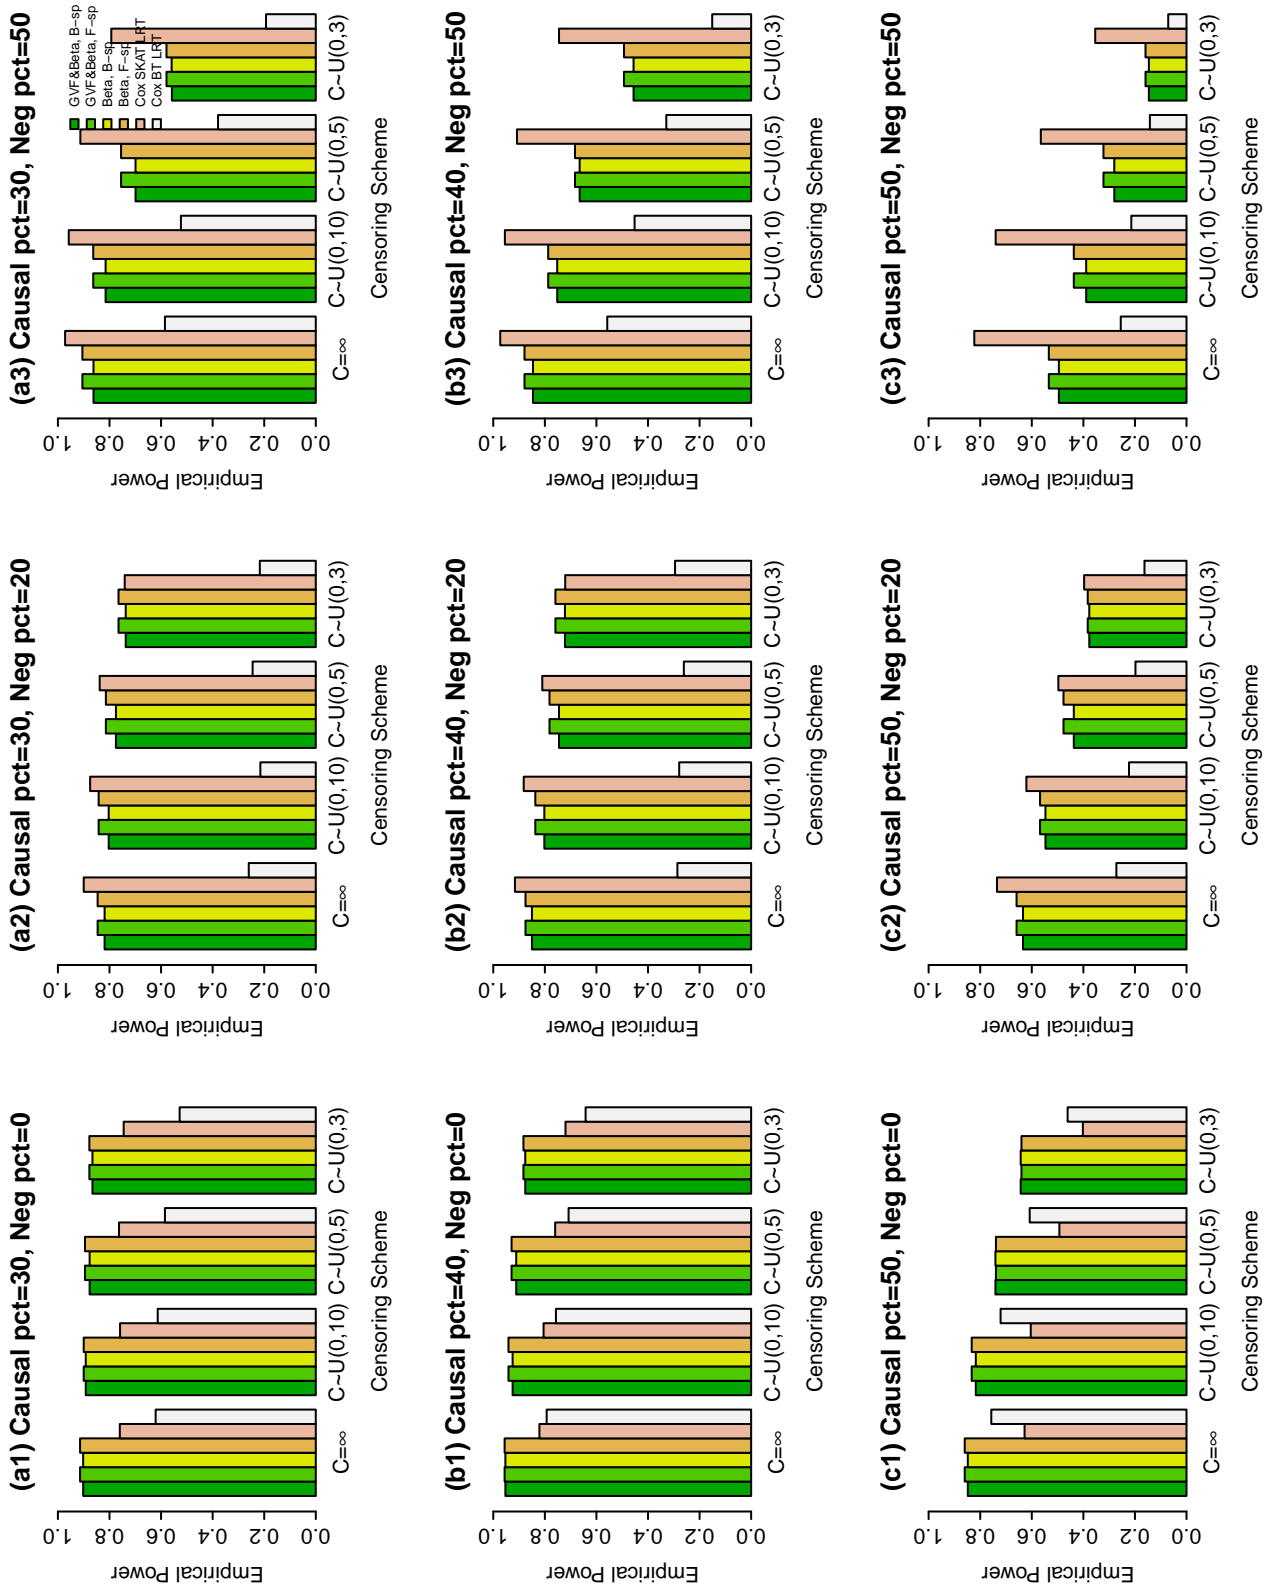

Figure B.4: The Empirical Power of the Cox FR LRT Statistics of the Cox Models (4) and (5) and Cox SKAT LRT and Cox BT LRT by Chen et al. (2014) at  $\alpha = 0.001$ , When All Causal Variants are Rare and a Sample Size of 2,000. When Neg pct = 0, All Causal Variants Had Positive Effects; When Neg pct = 20, 20%/80% Causal Variants Had Negative/Positive Effects; When Neg pct = 50, 50%/50% Causal Variants Had Negative/Positive Effects. The order of B-spline basis was 4, and the number of B-spline basis functions was  $K = K_\beta = 8$ ; the number of Fourier basis functions was  $K = K_\beta = 9$ .

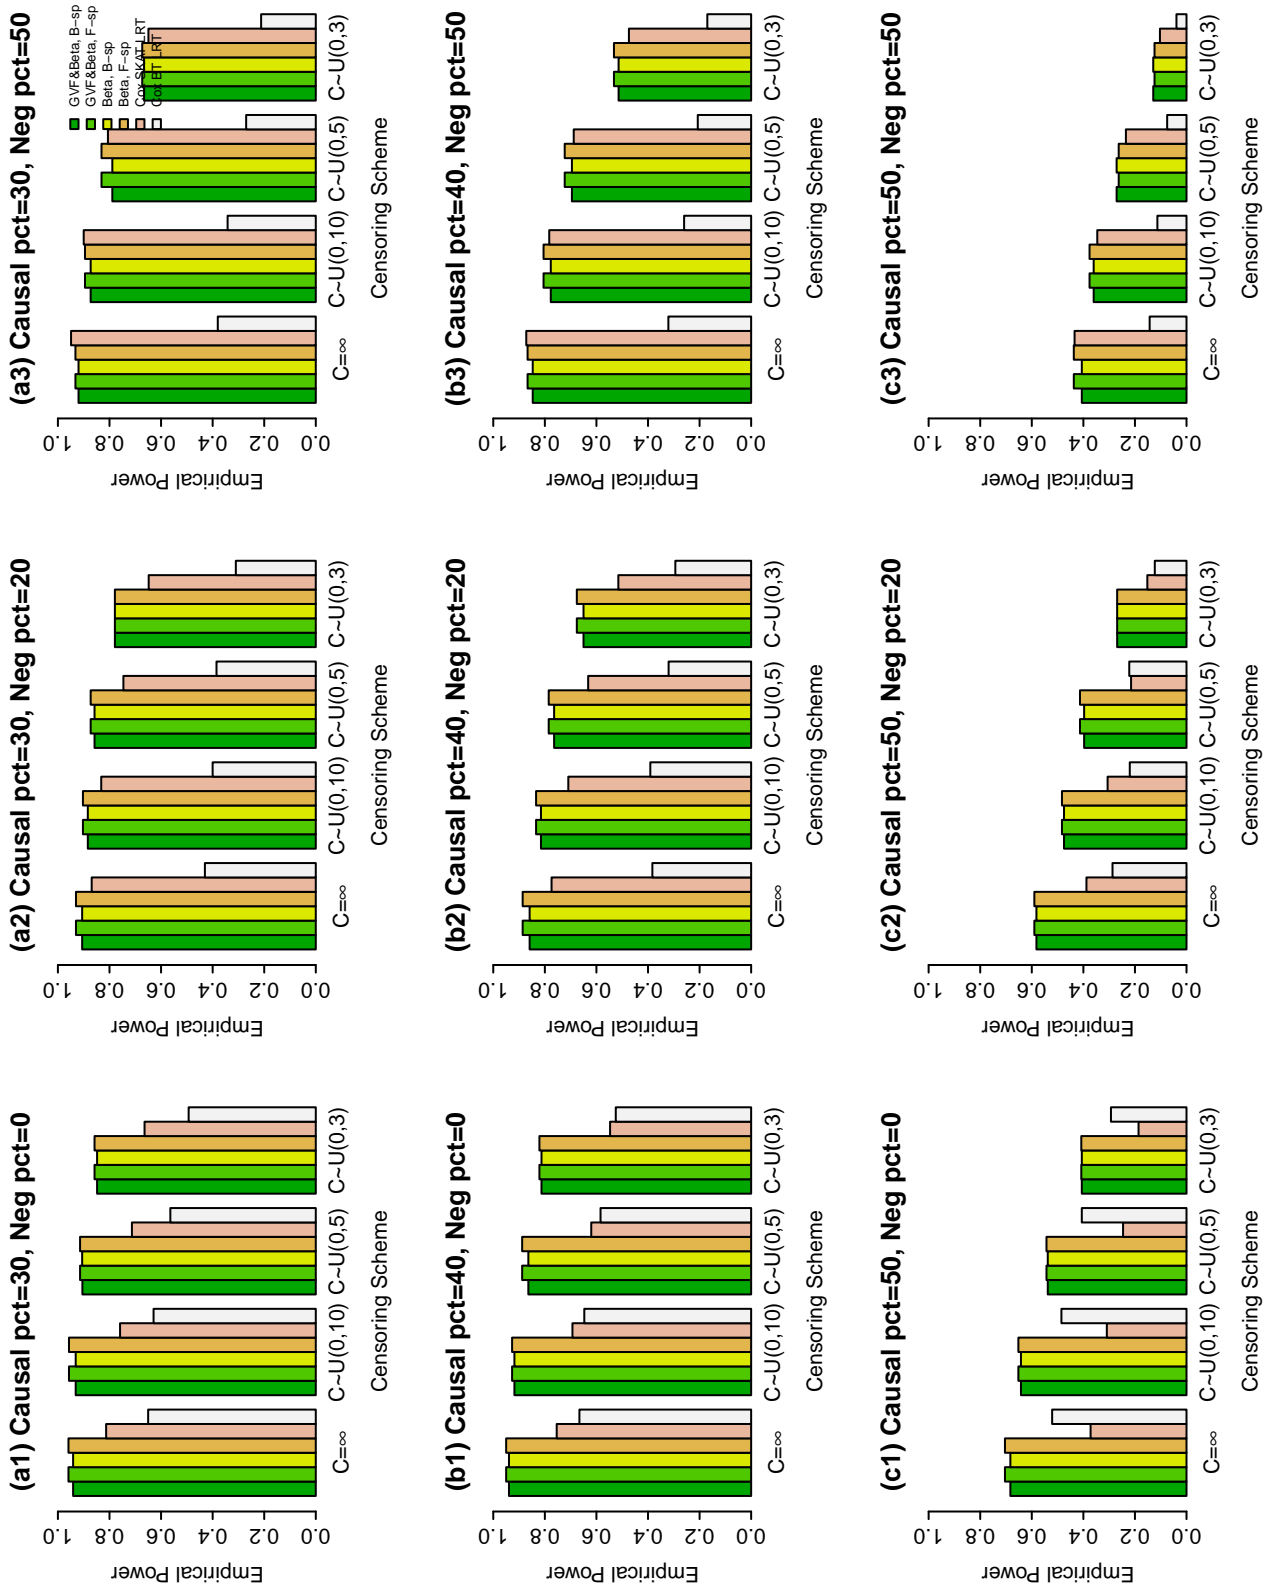

Figure B.5: The Empirical Power of the Cox FR LRT Statistics of the Cox Models (4) and (5) and Cox SKAT LRT and Cox BT LRT by Chen et al. (2014) at  $\alpha = 0.001$ , When Some Causal Variants are Rare and Some are Common and a Sample Size of 2,000. When Neg pct = 0, All Causal Variants Had Positive Effects; When Neg pct = 20, 20%/80% Causal Variants Had Negative/Positive Effects; When Neg pct = 50, 50%/50% Causal Variants Had Negative/Positive Effects. The order of B-spline basis was 4, and the number of B-spline basis functions was  $K = K_\beta = 10$ ; the number of Fourier basis functions was  $K = K_\beta = 11$ .

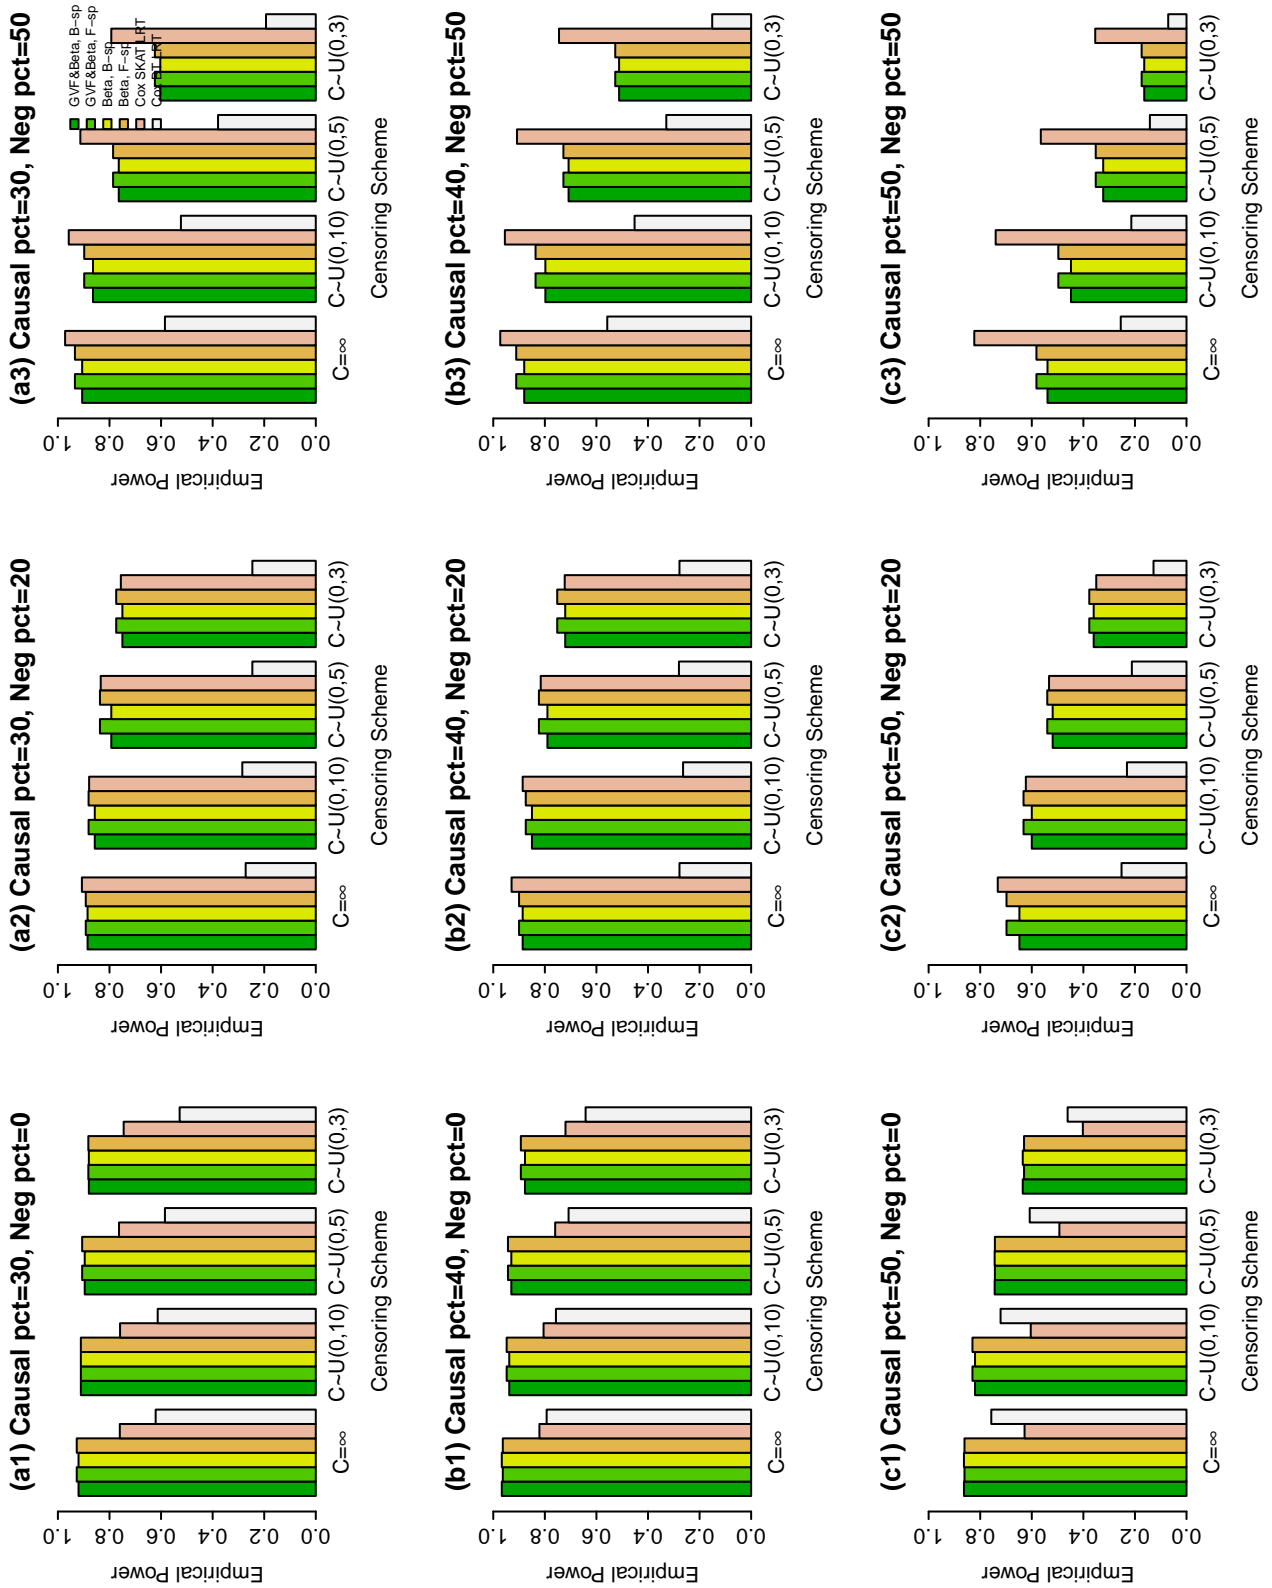

Figure B.6: The Empirical Power of the Cox FR LRT Statistics of the Cox Models (4) and (5) and Cox SKAT LRT and Cox BT LRT by Chen et al. (2014) at  $\alpha = 0.001$ , When All Causal Variants are Rare and a Sample Size of 2,000. When Neg pct = 0, All Causal Variants Had Positive Effects; When Neg pct = 20, 20%/80% Causal Variants Had Negative/Positive Effects; When Neg pct = 50, 50%/50% Causal Variants Had Negative/Positive Effects. The order of B-spline basis was 4, and the number of B-spline basis functions was  $K = K_\beta = 10$ ; the number of Fourier basis functions was  $K = K_\beta = 11$ . 21

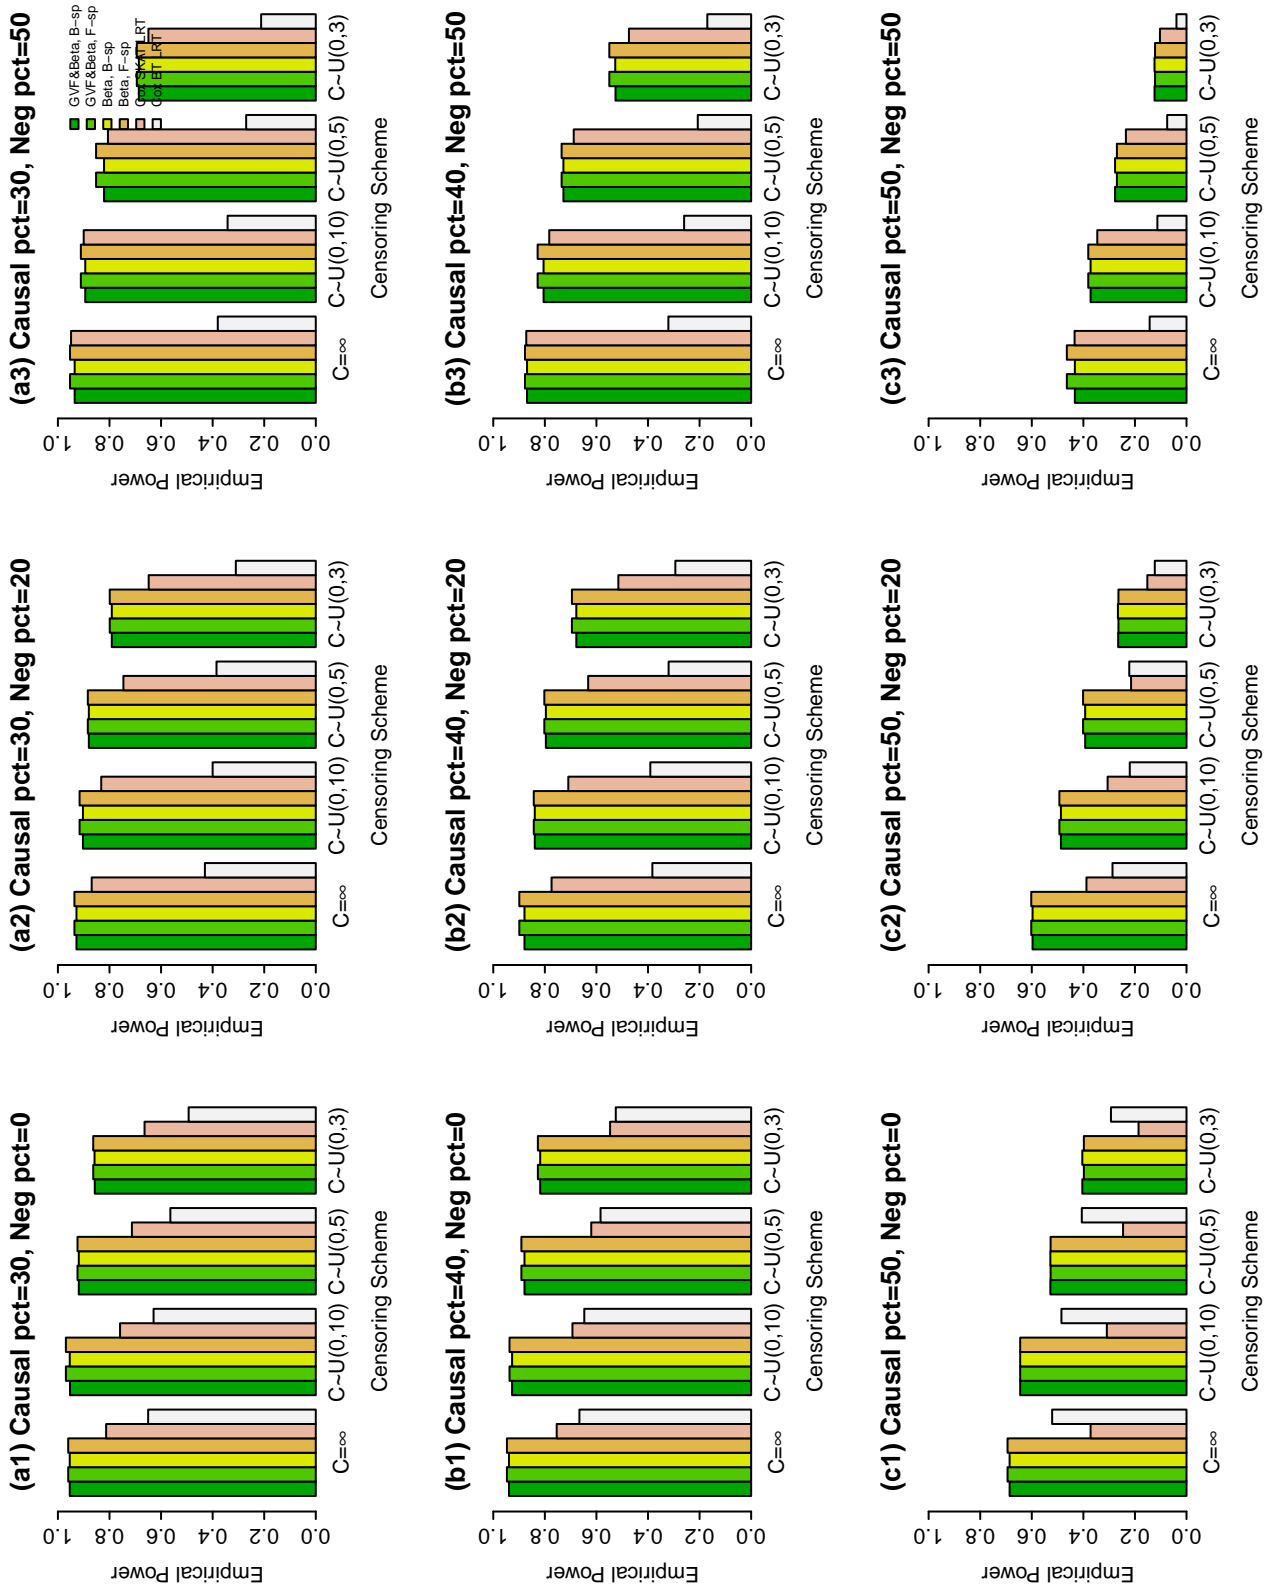

Figure B.7: The Empirical Power of the Cox FR LRT Statistics of the Cox Models (4) and (5) and Cox SKAT LRT and Cox BT LRT by Chen et al. (2014) at  $\alpha = 0.001$ , When Some Causal Variants are Rare and Some are Common and a Sample Size of 2,000. When Neg pct = 0, All Causal Variants Had Positive Effects; When Neg pct = 20, 20%/80% Causal Variants Had Negative/Positive Effects; When Neg pct = 50, 50%/50% Causal Variants Had Negative/Positive Effects. The order of B-spline basis was 4, and the number of B-spline basis functions was  $K = K_\beta = 12$ ; the number of Fourier basis functions was  $K = K_\beta = 13$ .

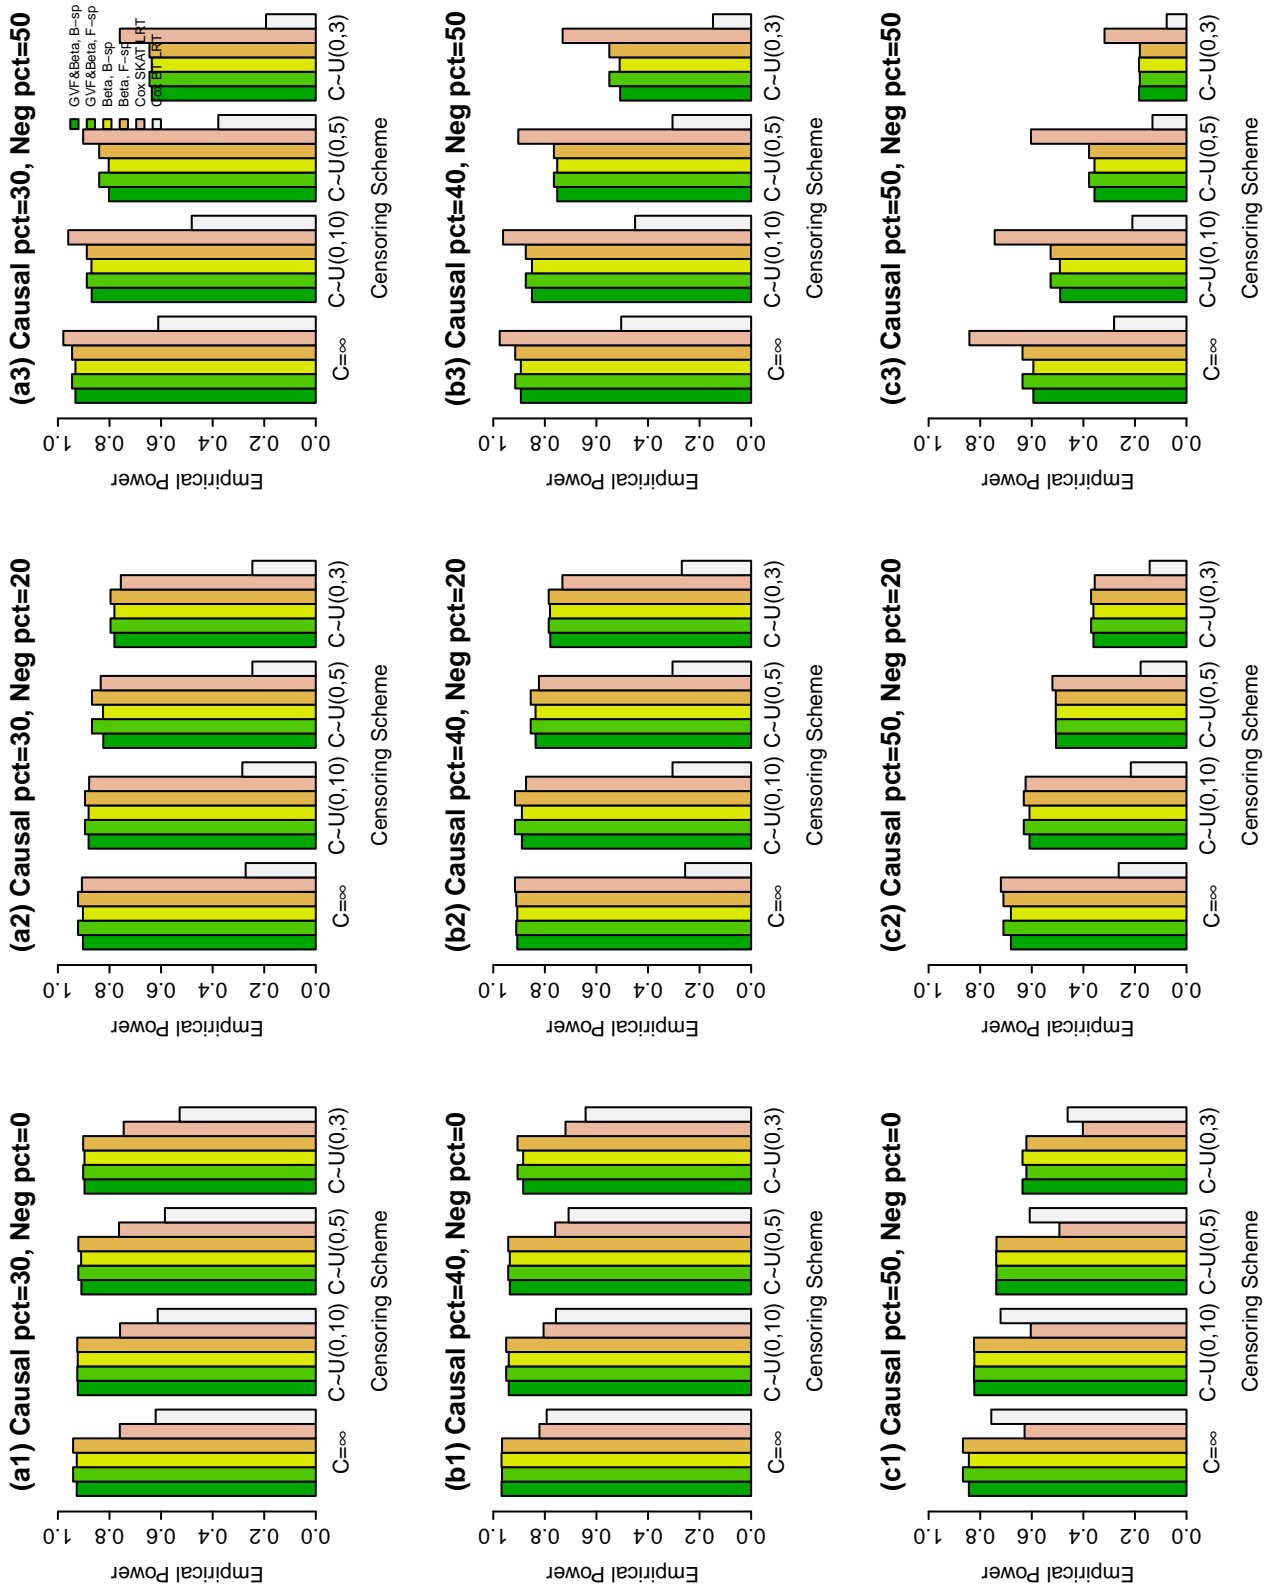

Figure B.8: The Empirical Power of the Cox FR LRT Statistics of the Cox Models (4) and (5) and Cox SKAT LRT and Cox BT LRT by Chen et al. (2014) at  $\alpha = 0.001$ , When All Causal Variants are Rare and a Sample Size of 2,000. When Neg pct = 0, All Causal Variants Had Positive Effects; When Neg pct = 20, 20%/80% Causal Variants Had Negative/Positive Effects; When Neg pct = 50, 50%/50% Causal Variants Had Negative/Positive Effects. The order of B-spline basis was 4, and the number of B-spline basis functions was  $K = K_\beta = 12$ ; the number of Fourier basis functions was  $K = K_\beta = 13$ . 23
